# Supplementary material for: Radical pair formation due to compression-induced electron transfer in crystals of energetic salts
Source: Royal Society of Chemistry journal article supplement (doi:10.1039/d0cp05587e), 2020-12-14
Supplement: d0cp05587e1.pdf [file d0cp05587e1.pdf]

# RADICAL PAIR FORMATION DUE TO COMPRESSION-INDUCED ELECTRON TRANSFER IN CRYSTALS OF ENERGETIC SALTS

---

Sergey V. Bondarchuk

Department of Chemistry and Nanomaterials Science,  
Bogdan Khmelnytsky Cherkasy National University,  
blvd. Shevchenko 81, 18031 Cherkasy, Ukraine.

Tel: (+3) 80472 37-65-76;

Fax: (+3) 80472 37-21-42;

E-mail: [bondchem@cdu.edu.ua](mailto:bondchem@cdu.edu.ua)

---

Phys. Chem. Chem. Phys.

## LIST OF SUPPLEMENTARY FIGURES AND TABLES:

|                                                                                                                                                                                                                                                           |     |
|-----------------------------------------------------------------------------------------------------------------------------------------------------------------------------------------------------------------------------------------------------------|-----|
| <b>Fig. S1.</b> Chemical formulas and full names of the salts studied                                                                                                                                                                                     | S3  |
| <b>Fig. S2.</b> Crystal structures of the salts studied                                                                                                                                                                                                   | S4  |
| <b>Table S1.</b> The calculated and experimental (in parentheses) asymmetric cell parameters of the salts studied                                                                                                                                         | S7  |
| <b>Table S2.</b> The relative errors $\delta = (V_{theor} - V_{exper})/V_{exper}$ of the asymmetric cell volumes estimation                                                                                                                               | S9  |
| <b>Table S3.</b> The Mulliken (M) and Hirshfeld (H) partial charges ( $e^-$ ) at different pressures along with the frontier molecular orbitals energies (eV)                                                                                             | S10 |
| <b>Table S4.</b> Decomposition equations applied for the calculations of the stored energy content ( $E_c$ )                                                                                                                                              | S11 |
| <b>Fig. S3.</b> $NH_4^\bullet$ radicals before (a) and after (b) MD simulation at ambient conditions                                                                                                                                                      | S12 |
| <b>Fig. S4.</b> Crystal structures along with the optimized and experimental (in parentheses) asymmetric cell parameters of salts <b>66-76</b>                                                                                                            | S13 |
| <b>Table S5.</b> Hirshfeld charges ( $e^-$ ) of the cation in the $NH_4X$ and $XN_3$ series at various pressures along with conceptual DFT parameters (eV) of the corresponding radicals ( $X^\bullet$ ) obtained in terms of the adiabatic approximation | S14 |
| <b>Fig. S5.</b> Dependence of conceptual DFT parameters ( $\chi$ , $\eta$ and $\omega$ ) on cationic charges at 100 GPa ( $q_{100}$ ) for the $NH_4X$ and $XN_3$ series salts.                                                                            | S14 |
| <b>Table S6.</b> The frontier molecular orbital energies and conceptual DFT parameters (in eV) obtained in terms of the vertical approximation                                                                                                            | S15 |
| <b>Table S7.</b> The frontier molecular orbital energies and conceptual DFT parameters (in eV) obtained in terms of the adiabatic approximation                                                                                                           | S16 |
| <b>Fig. S6.</b> Efficiency of various conceptual DFT parameters in distinguishing of compounds with the positive and negative energy content                                                                                                              | S18 |

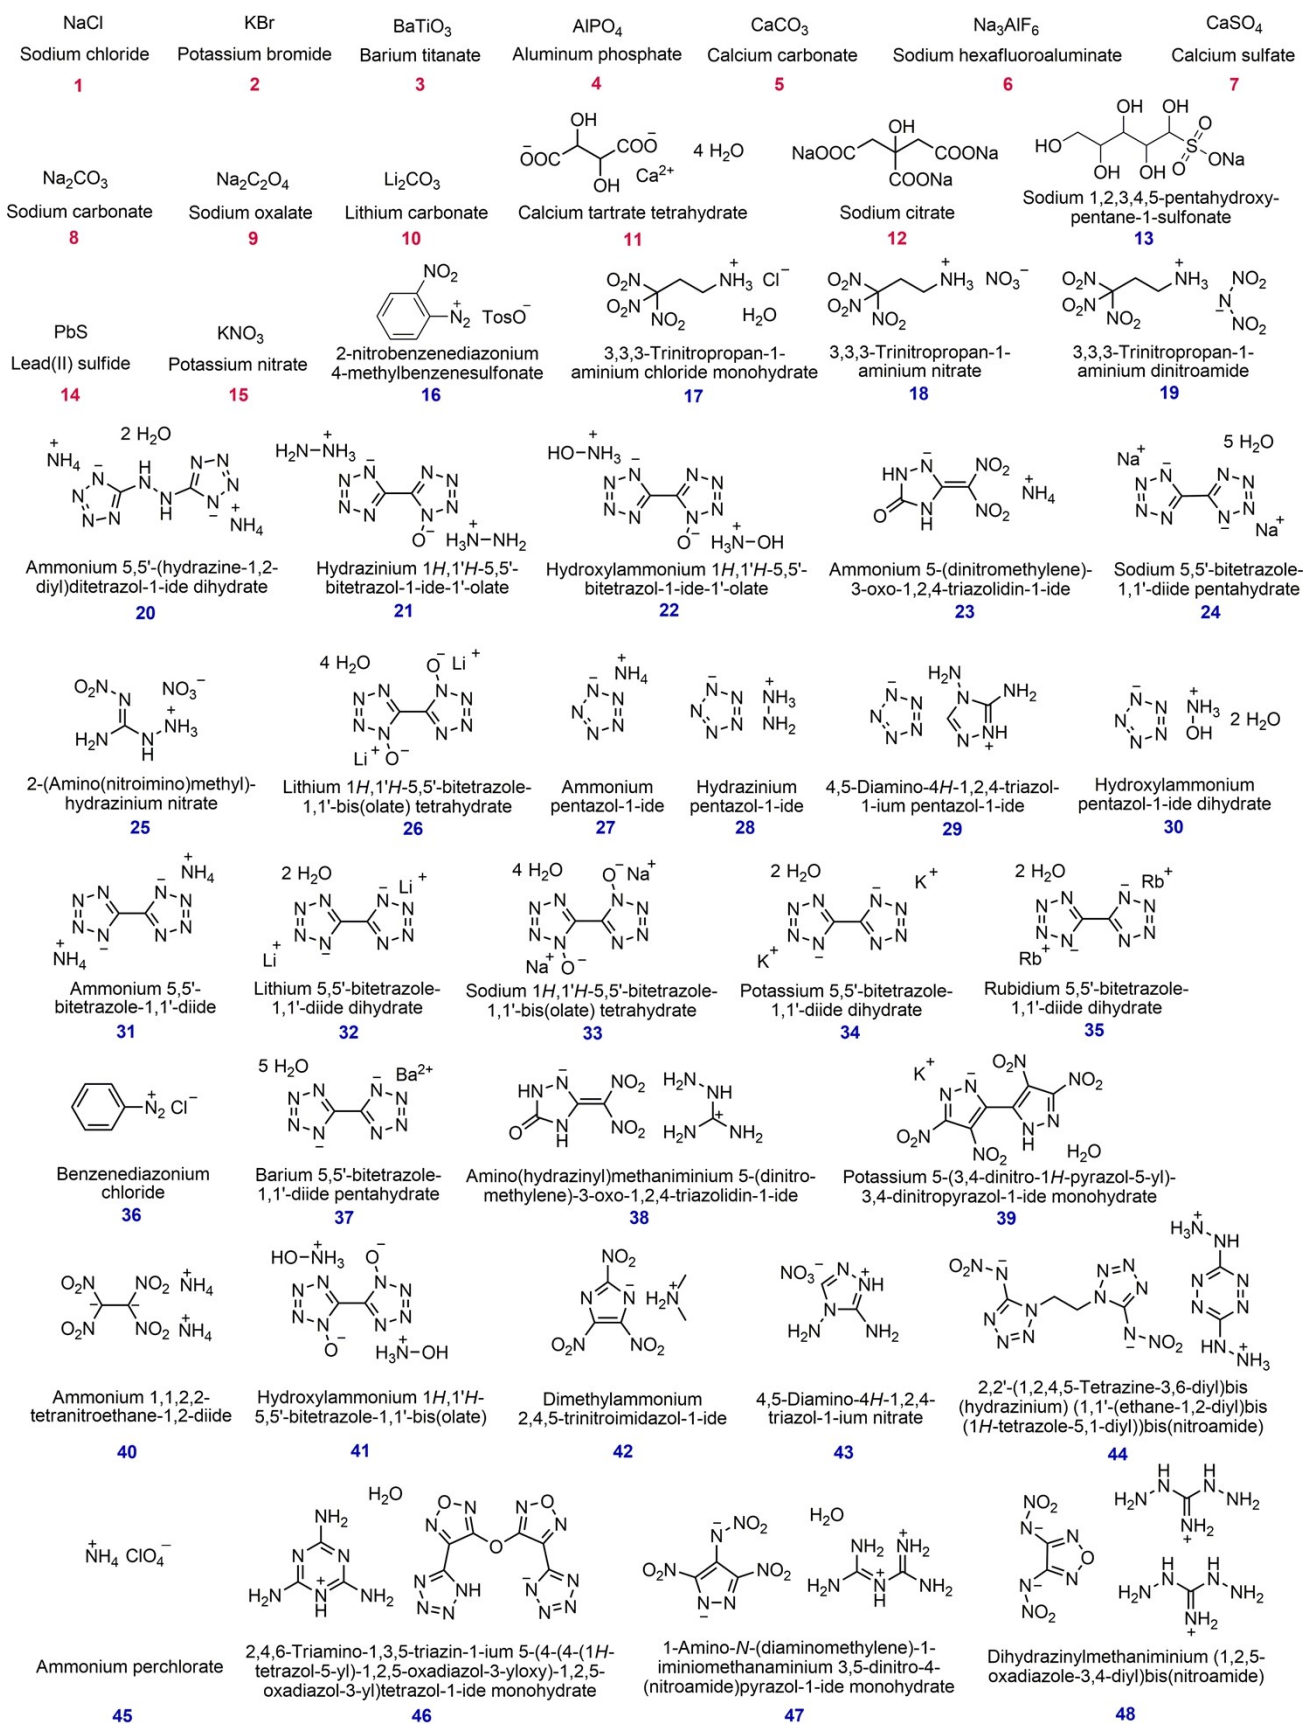

**Fig. S1.** Chemical formulas and full names of the salts studied.

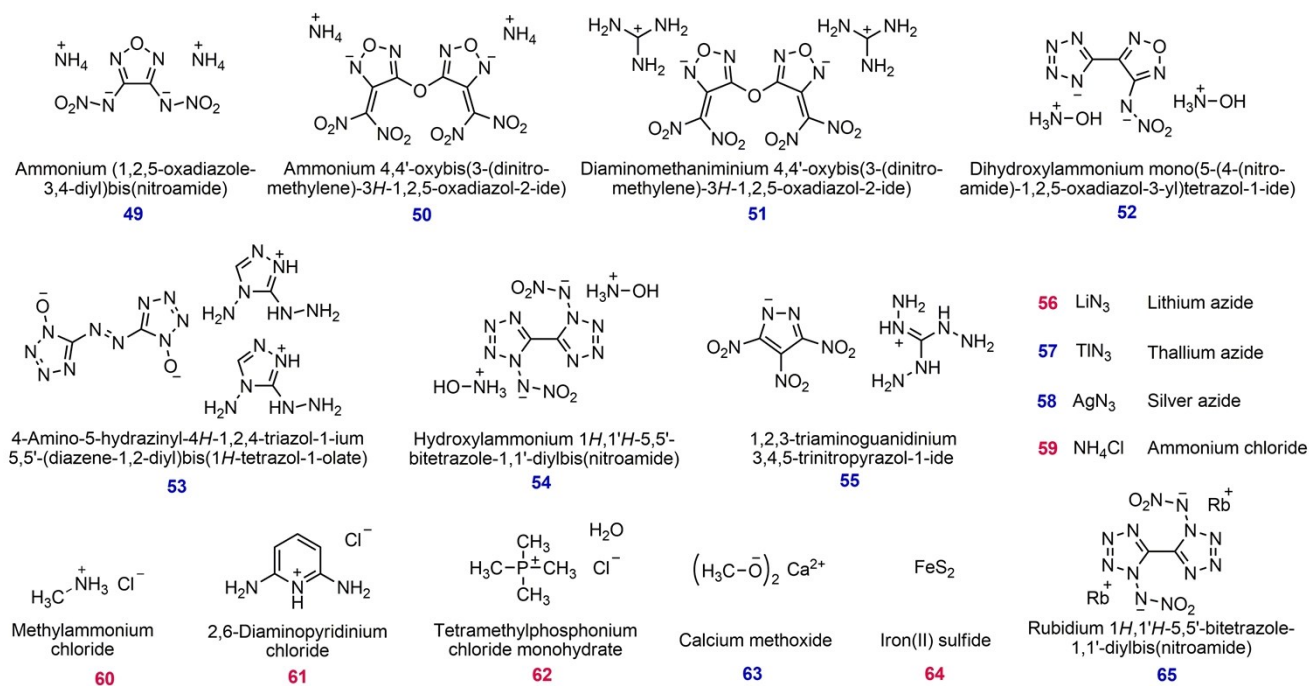

Fig. S1. Continue.

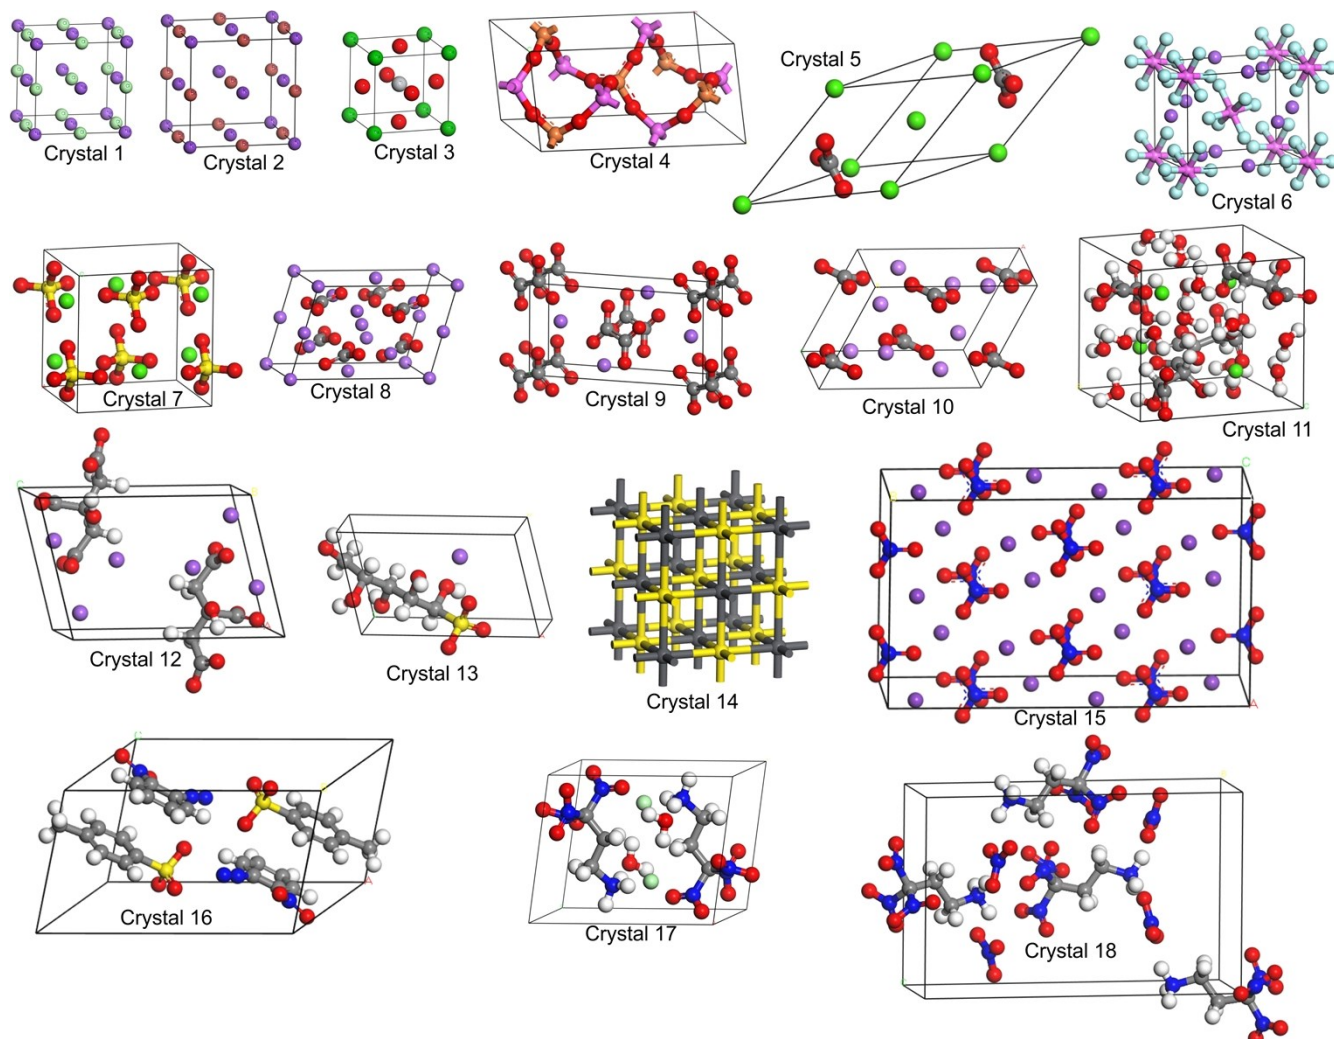

Fig. S2. Crystal structures of the salts studied.

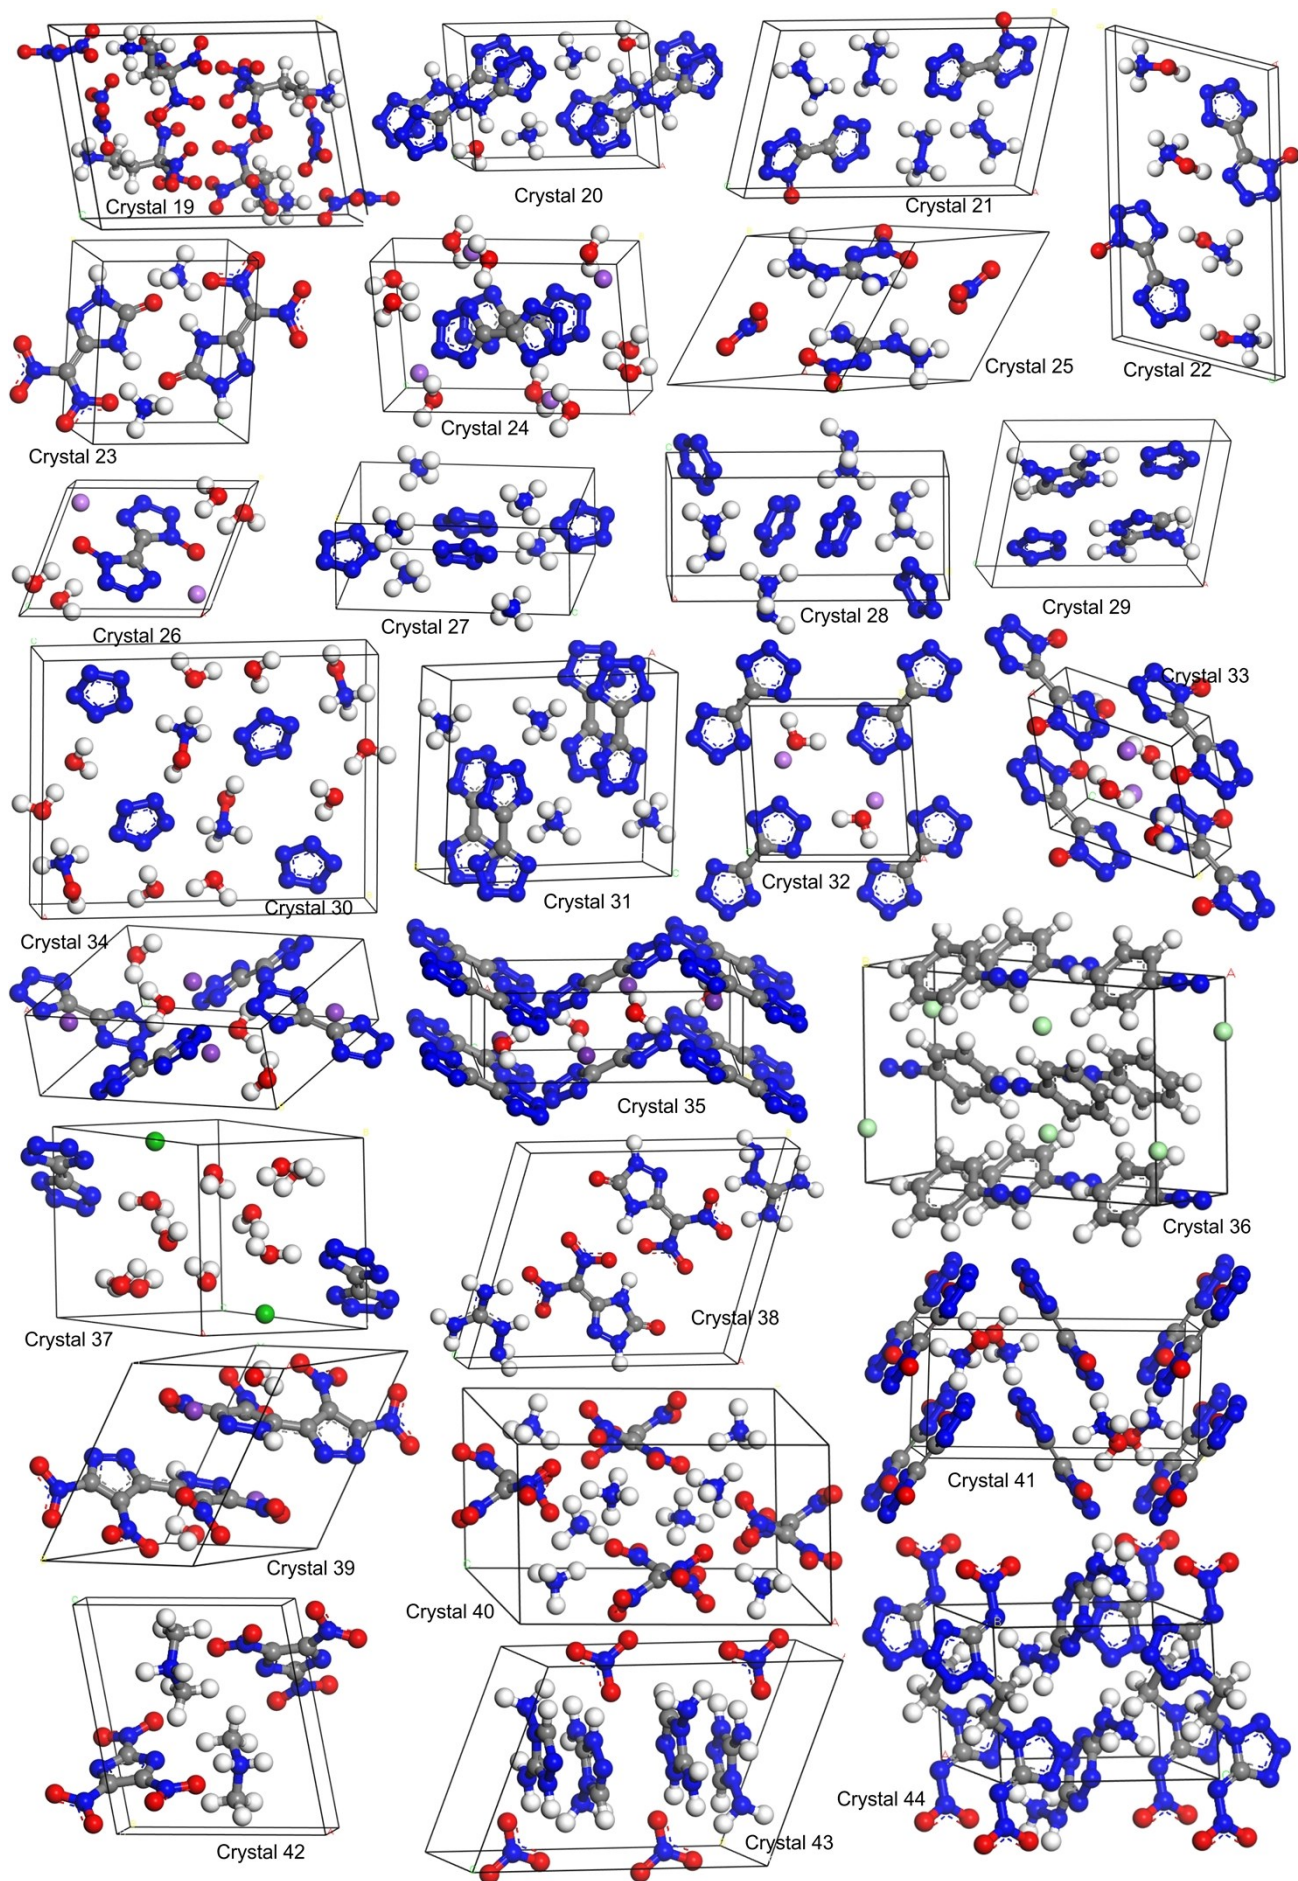

Fig. S2. Continue.  
S5

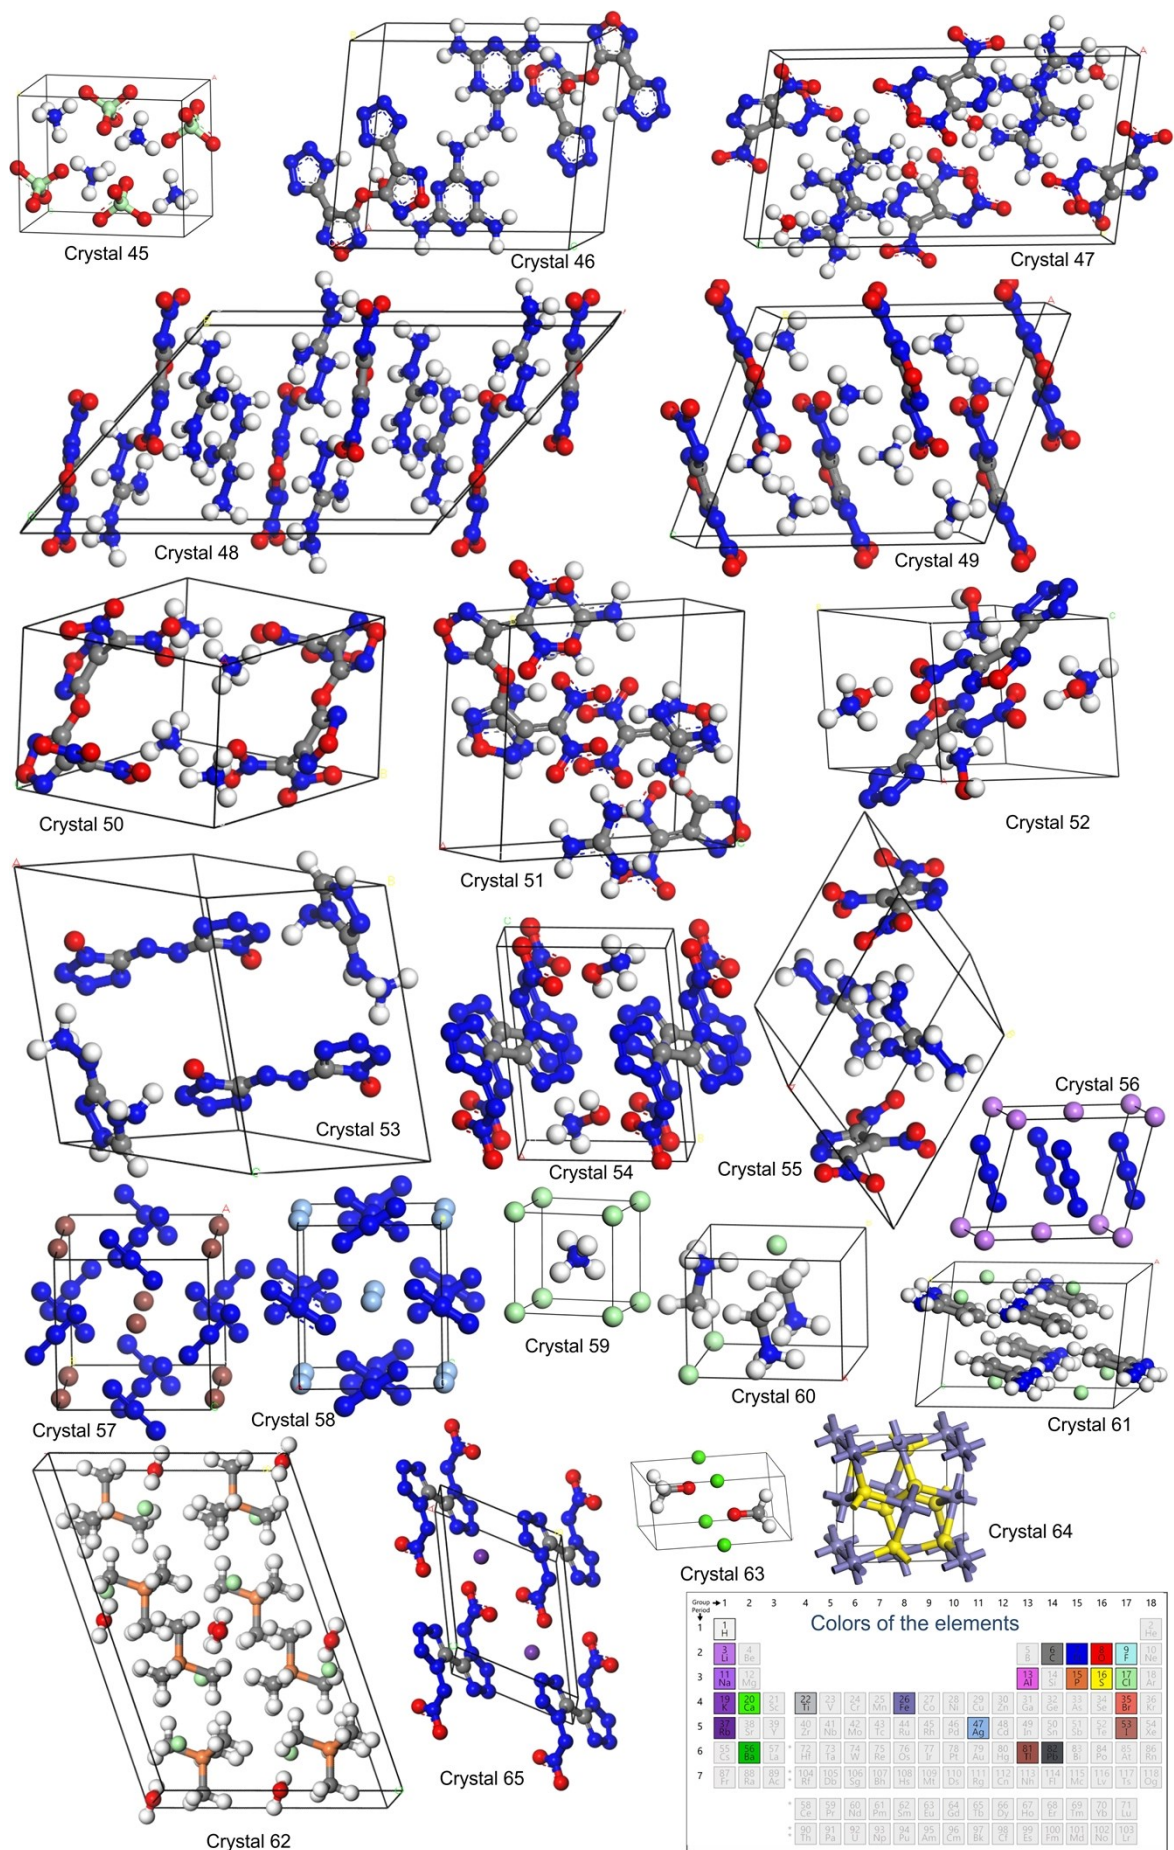

Fig. S2. Continue.  
S6

**Table S1. The calculated and experimental (in parentheses) asymmetric cell parameters of the salts studied.**

| Crystal | Space group                                           | <i>a</i>           | <i>b</i>           | <i>c</i>           | $\alpha$         | $\beta$          | $\gamma$         |
|---------|-------------------------------------------------------|--------------------|--------------------|--------------------|------------------|------------------|------------------|
| 1       | <i>Fm</i> $\bar{3}m$                                  | 5.672<br>(5.640)   |                    |                    |                  |                  |                  |
| 2       | <i>Fm</i> $\bar{3}m$                                  | 6.597<br>(6.597)   |                    |                    |                  |                  |                  |
| 3       | <i>Pm</i> $\bar{3}m$                                  | 3.954<br>(4.010)   |                    |                    |                  |                  |                  |
| 4       | <i>P</i> 3 <sub>1</sub> 2 <sub>1</sub>                | 5.053<br>(4.942)   |                    | 11.092<br>(10.945) |                  |                  |                  |
| 5       | <i>R</i> $\bar{3}c$                                   | 6.351<br>(6.375)   |                    |                    | 46.5<br>(46.1)   |                  |                  |
| 6       | <i>P</i> 2 <sub>1</sub> / <i>n</i>                    | 5.276<br>(5.402)   | 5.546<br>(5.596)   | 7.534<br>(7.756)   |                  | 90.9<br>(90.3)   |                  |
| 7       | <i>Amma</i>                                           | 7.016<br>(6.991)   | 7.012<br>(6.996)   | 6.326<br>(6.238)   |                  |                  |                  |
| 8       | <i>C</i> 2/ <i>m</i>                                  | 8.804<br>(8.825)   | 5.288<br>(5.194)   | 5.921<br>(5.953)   |                  | 104.8<br>(101.8) |                  |
| 9       | <i>P</i> 2 <sub>1</sub> / <i>a</i>                    | 10.299<br>(10.350) | 5.334<br>(5.260)   | 3.442<br>(3.460)   |                  | 91.4<br>(92.9)   |                  |
| 10      | <i>C</i> /2 <i>c</i>                                  | 8.369<br>(8.359)   | 4.972<br>(4.973)   | 6.111<br>(6.198)   |                  | 114.5<br>(114.8) |                  |
| 11      | <i>P</i> 2 <sub>1</sub> 2 <sub>1</sub> 2 <sub>1</sub> | 9.488<br>(9.631)   | 10.455<br>(10.573) | 9.109<br>(9.215)   |                  |                  |                  |
| 12      | <i>P</i> 2 <sub>1</sub>                               | 7.337<br>(7.347)   | 5.366<br>(5.435)   | 10.747<br>(11.034) |                  | 103.9<br>(103.9) |                  |
| 13      | <i>P</i> 1                                            | 4.840<br>(4.856)   | 5.911<br>(5.850)   | 8.880<br>(8.795)   | 76.0<br>(76.5)   | 81.6<br>(81.5)   | 71.5<br>(71.4)   |
| 14      | <i>Fm</i> $\bar{3}m$                                  | 5.863<br>(5.930)   |                    |                    |                  |                  |                  |
| 15      | <i>Cmc</i> 2 <sub>1</sub>                             | 10.892<br>(10.904) | 18.429<br>(18.455) | 6.362<br>(6.421)   |                  |                  |                  |
| 16      | <i>P</i> $\bar{1}$                                    | 7.489<br>(7.509)   | 7.572<br>(7.546)   | 13.611<br>(13.672) | 78.6<br>(78.6)   | 76.7<br>(75.7)   | 75.3<br>(75.6)   |
| 17      | <i>P</i> $\bar{1}$                                    | 6.770<br>(6.743)   | 7.826<br>(7.805)   | 10.154<br>(10.066) | 89.8<br>(90.4)   | 99.2<br>(98.8)   | 113.9<br>(114.1) |
| 18      | <i>P</i> 2 <sub>1</sub> 2 <sub>1</sub> 2 <sub>1</sub> | 5.698<br>(5.662)   | 10.293<br>(10.283) | 16.382<br>(16.258) |                  |                  |                  |
| 19      | <i>P</i> $\bar{1}$                                    | 6.766<br>(6.709)   | 11.381<br>(11.255) | 15.394<br>(15.214) | 75.1<br>(75.5)   | 79.4<br>(79.3)   | 75.5<br>(75.7)   |
| 20      | <i>P</i> $\bar{1}$                                    | 4.018<br>(3.824)   | 7.093<br>(6.967)   | 9.670<br>(9.920)   | 82.4<br>(80.5)   | 90.6<br>(88.7)   | 86.1<br>(79.5)   |
| 21      | <i>P</i> $\bar{1}$                                    | 3.614<br>(3.655)   | 8.441<br>(8.436)   | 14.289<br>(14.338) | 102.8<br>(103.6) | 96.4<br>(96.6)   | 93.2<br>(93.3)   |
| 22      | <i>P</i> $\bar{1}$                                    | 3.628<br>(3.606)   | 8.020<br>(8.019)   | 14.833<br>(14.798) | 105.5<br>(105.1) | 91.8<br>(91.7)   | 96.5<br>(96.0)   |
| 23      | <i>P</i> $\bar{1}$                                    | 6.764<br>(6.785)   | 7.092<br>(7.137)   | 8.070<br>(7.965)   | 84.3<br>(85.1)   | 75.0<br>(74.0)   | 84.6<br>(84.9)   |
| 24      | <i>P</i> $\bar{1}$                                    | 7.199<br>(7.209)   | 7.429<br>(7.462)   | 10.679<br>(10.775) | 82.2<br>(81.3)   | 76.6<br>(76.5)   | 68.5<br>(67.6)   |
| 25      | <i>P</i> $\bar{1}$                                    | 7.288<br>(7.175)   | 7.181<br>(7.202)   | 7.909<br>(7.856)   | 65.8<br>(66.1)   | 63.1<br>(65.3)   | 66.1<br>(68.5)   |
| 26      | <i>P</i> $\bar{1}$                                    | 5.280<br>(5.345)   | 6.343<br>(6.363)   | 8.228<br>(8.300)   | 105.4<br>(105.9) | 97.6<br>(98.2)   | 112.3<br>(111.5) |
| 27      | <i>Pcca</i>                                           | 9.488<br>(9.399)   | 3.956<br>(3.954)   | 10.353<br>(10.362) |                  |                  |                  |

Table S1. Continue.

| Crystal | Space group | <i>a</i>           | <i>b</i>           | <i>c</i>           | $\alpha$         | $\beta$          | $\gamma$         |
|---------|-------------|--------------------|--------------------|--------------------|------------------|------------------|------------------|
| 28      | $P2_1/c$    | 6.554<br>(6.453)   | 12.076<br>(12.247) | 5.369<br>(5.407)   |                  | 97.9<br>(97.8)   |                  |
| 29      | $P\bar{1}$  | 5.315<br>(5.298)   | 7.128<br>(7.156)   | 10.174<br>(10.106) | 100.6<br>(100.0) | 103.9<br>(104.1) | 103.7<br>(104.1) |
| 30      | $P2_1/c$    | 3.630<br>(3.685)   | 14.796<br>(14.638) | 11.443<br>(11.575) |                  | 90.8<br>(90.3)   |                  |
| 31      | $Pban$      | 9.123<br>(9.130)   | 10.691<br>(10.763) | 3.669<br>(3.666)   |                  |                  |                  |
| 32      | $P\bar{1}$  | 3.353<br>(3.368)   | 7.368<br>(7.362)   | 7.490<br>(7.501)   | 83.2<br>(82.9)   | 86.5<br>(87.1)   | 80.4<br>(80.8)   |
| 33      | $P\bar{1}$  | 5.587<br>(5.681)   | 6.471<br>(6.451)   | 8.354<br>(8.355)   | 99.5<br>(100.3)  | 97.0<br>(97.3)   | 111.7<br>(111.8) |
| 34      | $P2_1/c$    | 3.836<br>(3.851)   | 11.347<br>(11.316) | 9.750<br>(9.735)   |                  | 93.6<br>(93.0)   |                  |
| 35      | $P2_1/c$    | 4.051<br>(4.088)   | 11.355<br>(11.328) | 9.990<br>(9.948)   |                  | 94.6<br>(93.5)   |                  |
| 36      | $C222_1$    | 15.050<br>(15.152) | 4.860<br>(4.928)   | 9.011<br>(9.044)   |                  |                  |                  |
| 37      | $P\bar{1}$  | 7.417<br>(7.440)   | 7.876<br>(8.162)   | 9.272<br>(9.259)   | 89.3<br>(88.6)   | 74.0<br>(73.7)   | 88.7<br>(88.9)   |
| 38      | $P\bar{1}$  | 3.630<br>(3.648)   | 10.997<br>(10.984) | 13.276<br>(13.201) | 107.4<br>(107.2) | 94.6<br>(95.4)   | 98.6<br>(99.1)   |
| 39      | $P\bar{1}$  | 7.336<br>(7.354)   | 8.853<br>(9.047)   | 10.809<br>(10.724) | 105.1<br>(105.6) | 94.9<br>(94.5)   | 108.7<br>(108.9) |
| 40      | $P2_1/n$    | 9.322<br>(9.255)   | 7.865<br>(7.800)   | 13.152<br>(13.135) |                  | 107.8<br>(107.9) |                  |
| 41      | $P2_1/c$    | 5.527<br>(5.426)   | 11.523<br>(11.660) | 6.480<br>(6.501)   |                  | 96.10<br>(95.26) |                  |
| 42      | $P2_1$      | 8.516<br>(8.484)   | 6.163<br>(6.144)   | 9.507<br>(9.439)   |                  | 100.9<br>(100.6) |                  |
| 43      | $P2_1/c$    | 8.764<br>(8.527)   | 6.132<br>(6.265)   | 12.401<br>(12.760) |                  | 110.0<br>(112.0) |                  |
| 44      | $P\bar{1}$  | 6.796<br>(6.771)   | 7.639<br>(7.562)   | 8.737<br>(8.712)   | 96.6<br>(96.5)   | 101.7<br>(101.9) | 115.5<br>(115.0) |
| 45      | $Pnma$      | 8.859<br>(9.130)   | 6.043<br>(5.790)   | 7.241<br>(7.470)   |                  |                  |                  |
| 46      | $P\bar{1}$  | 6.535<br>(6.691)   | 10.776<br>(10.822) | 12.326<br>(12.259) | 84.8<br>(85.2)   | 76.4<br>(76.7)   | 84.2<br>(84.7)   |
| 47      | $P2_1/n$    | 9.758<br>(9.688)   | 7.062<br>(7.154)   | 18.405<br>(18.317) |                  | 97.9<br>(98.0)   |                  |
| 48      | $C2/c$      | 18.570<br>(18.761) | 8.268<br>(8.292)   | 12.572<br>(12.498) |                  | 131.4<br>(131.3) |                  |
| 49      | $C2/c$      | 12.136<br>(12.031) | 7.489<br>(7.401)   | 10.175<br>(9.981)  |                  | 111.2<br>(109.4) |                  |
| 50      | $P\bar{1}$  | 7.724<br>(7.691)   | 9.367<br>(9.290)   | 10.495<br>(10.564) | 93.8<br>(94.5)   | 104.4<br>(104.2) | 99.8<br>(100.4)  |
| 51      | $P\bar{1}$  | 8.747<br>(8.882)   | 10.374<br>(10.251) | 10.661<br>(10.718) | 79.0<br>(78.1)   | 86.0<br>(83.7)   | 72.2<br>(71.3)   |
| 52      | $P\bar{1}$  | 7.118<br>(7.130)   | 8.205<br>(8.131)   | 9.176<br>(9.057)   | 83.7<br>(83.4)   | 71.2<br>(71.7)   | 73.0<br>(72.5)   |
| 53      | $P\bar{1}$  | 8.262<br>(7.972)   | 8.374<br>(8.192)   | 10.743<br>(10.269) | 89.3<br>(90.4)   | 109.5<br>(110.2) | 117.5<br>(115.5) |
| 54      | $P\bar{1}$  | 5.176<br>(5.242)   | 6.649<br>(6.769)   | 8.476<br>(8.400)   | 96.9<br>(96.4)   | 90.2<br>(89.2)   | 97.9<br>(97.5)   |
| 55      | $P\bar{1}$  | 5.065<br>(5.113)   | 10.742<br>(10.676) | 11.565<br>(11.579) | 65.3<br>(66.3)   | 77.7<br>(78.5)   | 85.8<br>(84.9)   |



Table S1. Continue.

| Crystal | Space group             | <i>a</i>           | <i>b</i>         | <i>c</i>           | $\alpha$       | $\beta$          | $\gamma$       |
|---------|-------------------------|--------------------|------------------|--------------------|----------------|------------------|----------------|
| 56      | <i>C2/m</i>             | 5.602<br>(5.627)   | 3.282<br>(3.319) | 4.854<br>(4.979)   |                | 104.1<br>(107.4) |                |
| 57      | <i>I4/mcm</i>           | 6.131<br>(6.208)   |                  | 7.591<br>(7.355)   |                |                  |                |
| 58      | <i>Ibam</i>             | 6.186<br>(5.617)   | 5.366<br>(5.915) | 6.364<br>(6.006)   |                |                  |                |
| 59      | <i>P43m</i>             | 3.806<br>(3.860)   |                  |                    |                |                  |                |
| 60      | <i>Pmn2<sub>1</sub></i> | 5.971<br>(6.040)   | 4.813<br>(5.050) | 6.202<br>(6.040)   |                |                  |                |
| 61      | <i>C2/m</i>             | 10.805<br>(10.763) | 9.046<br>(9.076) | 6.811<br>(6.635)   |                | 96.7<br>(95.4)   |                |
| 62      | <i>C2/c</i>             | 11.818<br>(11.762) | 8.667<br>(8.628) | 17.591<br>(17.604) |                | 108.6<br>(107.5) |                |
| 63      | <i>P3m1</i>             | 3.688<br>(3.642)   |                  | 8.019<br>(8.311)   |                |                  |                |
| 64      | <i>Pa3</i>              | 5.317<br>(5.428)   |                  |                    |                |                  |                |
| 65      | <i>P1</i>               | 5.356<br>(5.303)   | 7.077<br>(7.063) | 8.621<br>(8.568)   | 66.5<br>(66.8) | 86.3<br>(86.7)   | 71.1<br>(70.0) |

Table S2. The relative errors  $\delta = (V_{theor} - V_{exper})/V_{exper}$  of the asymmetric cell volumes estimation.

| Salt | $V_{theor}$ (Å <sup>3</sup> ) | $V_{exper}$ (Å <sup>3</sup> ) | $\delta$ (%) | Salt | $V_{theor}$ (Å <sup>3</sup> ) | $V_{exper}$ (Å <sup>3</sup> ) | $\delta$ (%) |
|------|-------------------------------|-------------------------------|--------------|------|-------------------------------|-------------------------------|--------------|
| 1    | 182.48                        | 179.41                        | 1.71         | 34   | 423.55                        | 423.65                        | -0.02        |
| 2    | 287.10                        | 287.10                        | 0.00         | 35   | 458.05                        | 459.82                        | -0.38        |
| 3    | 61.82                         | 64.48                         | -4.13        | 36   | 659.09                        | 675.31                        | -2.40        |
| 4    | 283.21                        | 267.31                        | 5.95         | 37   | 520.51                        | 539.45                        | -3.51        |
| 5    | 123.07                        | 122.72                        | 0.29         | 38   | 495.64                        | 493.36                        | 0.46         |
| 6    | 220.42                        | 234.46                        | -5.99        | 39   | 630.95                        | 639.35                        | -1.31        |
| 7    | 311.22                        | 305.09                        | 2.01         | 40   | 918.12                        | 902.31                        | 1.75         |
| 8    | 266.51                        | 267.10                        | -0.22        | 41   | 410.36                        | 409.57                        | 0.19         |
| 9    | 189.03                        | 188.12                        | 0.48         | 42   | 489.97                        | 483.62                        | 1.31         |
| 10   | 231.39                        | 233.89                        | -1.07        | 43   | 626.26                        | 632.03                        | -0.91        |
| 11   | 903.59                        | 938.35                        | -3.70        | 44   | 390.27                        | 385.38                        | 1.27         |
| 12   | 410.73                        | 427.70                        | -3.97        | 45   | 387.65                        | 394.88                        | -1.83        |
| 13   | 233.10                        | 229.52                        | 1.56         | 46   | 837.34                        | 858.38                        | -2.45        |
| 14   | 201.54                        | 208.53                        | -3.35        | 47   | 1256.27                       | 1257.16                       | -0.07        |
| 15   | 1277.04                       | 1292.12                       | -1.17        | 48   | 1447.96                       | 1460.71                       | -0.87        |
| 16   | 718.54                        | 719.40                        | -0.12        | 49   | 862.20                        | 838.27                        | 2.85         |
| 17   | 484.41                        | 476.49                        | 1.66         | 50   | 720.04                        | 713.73                        | 0.88         |
| 18   | 960.80                        | 946.58                        | 1.50         | 51   | 904.08                        | 903.47                        | 0.07         |
| 19   | 1099.94                       | 1068.31                       | 2.96         | 52   | 485.07                        | 475.31                        | 2.05         |
| 20   | 272.48                        | 256.29                        | 6.32         | 53   | 612.48                        | 558.43                        | 9.68         |
| 21   | 420.96                        | 425.21                        | -1.00        | 54   | 286.79                        | 293.67                        | -2.34        |
| 22   | 412.37                        | 410.15                        | 0.54         | 55   | 558.44                        | 567.10                        | -1.53        |
| 23   | 371.13                        | 368.54                        | 0.70         | 56   | 86.56                         | 88.73                         | -2.45        |
| 24   | 516.10                        | 519.82                        | -0.72        | 57   | 285.34                        | 283.46                        | 0.66         |
| 25   | 324.17                        | 327.54                        | -1.03        | 58   | 211.25                        | 199.55                        | 5.86         |
| 26   | 237.27                        | 243.11                        | -2.40        | 59   | 55.13                         | 57.51                         | -4.14        |
| 27   | 388.59                        | 385.09                        | 0.91         | 60   | 178.24                        | 184.23                        | -3.25        |
| 28   | 420.90                        | 423.36                        | -0.58        | 61   | 661.18                        | 645.27                        | 2.47         |
| 29   | 351.47                        | 349.18                        | 0.66         | 62   | 1707.69                       | 1703.83                       | 0.23         |
| 30   | 614.54                        | 624.37                        | -1.57        | 63   | 109.07                        | 110.24                        | -1.06        |
| 31   | 357.85                        | 360.24                        | -0.66        | 64   | 150.31                        | 159.93                        | -6.02        |
| 32   | 181.00                        | 182.10                        | -0.60        | 65   | 282.72                        | 276.06                        | 2.41         |
| 33   | 271.21                        | 273.38                        | -0.79        |      |                               |                               |              |

**Table S3. The Mulliken (M) and Hirshfeld (H) partial charges ( $e^-$ ) at different pressures along with the frontier molecular orbitals energies (eV).**

| Salt | 0 GPa |       | 20 GPa |        | 50 GPa |        | 100 GPa |        | Anion             |                   | Cation            |                   |
|------|-------|-------|--------|--------|--------|--------|---------|--------|-------------------|-------------------|-------------------|-------------------|
|      | M     | H     | M      | H      | M      | H      | M       | H      | $E_{\text{HOMO}}$ | $E_{\text{LUMO}}$ | $E_{\text{HOMO}}$ | $E_{\text{LUMO}}$ |
| 1    | 0.621 | 0.210 | 0.595  | 0.170  | 0.565  | 0.170  | 0.525   | 0.180  | -0.769            | 5.89              | -39.53            | -6.98             |
| 2    | 0.713 | 0.250 | 0.707  | 0.190  | 0.687  | 0.170  | 0.673   | 0.170  | -0.860            | 4.81              | -26.73            | -6.00             |
| 3    | 0.714 | 0.200 | 0.681  | 0.194  | 0.663  | 0.200  | 0.651   | 0.205  | 3.820             | 4.79              | -32.66            | -11.98            |
| 4    | 0.610 | 0.193 | 0.600  | 0.173  | 0.640  | 0.160  | 0.720   | 0.149  | 9.031             | 11.42             | -108.48           | -32.58            |
| 5    | 0.731 | 0.195 | 0.684  | 0.166  | 0.651  | 0.146  | 0.609   | 0.130  | 5.791             | 9.00              | -45.15            | -14.24            |
| 6    | 0.793 | 0.288 | 0.822  | 0.262  | 0.852  | 0.259  | 0.877   | 0.260  | 5.912             | 10.34             | -39.53            | -6.98             |
| 7    | 0.890 | 0.181 | 0.920  | 0.139  | 0.960  | 0.120  | 1.000   | 0.106  | 3.606             | 8.33              | -45.15            | -14.24            |
| 8    | 0.950 | 0.270 | 0.970  | 0.262  | 0.987  | 0.257  | 1.010   | 0.263  | 5.791             | 9.00              | -39.53            | -6.98             |
| 9    | 0.750 | 0.283 | 0.705  | 0.240  | 0.710  | 0.238  | 0.740   | 0.243  | 3.685             | 8.11              | -39.53            | -6.98             |
| 10   | 1.062 | 0.190 | 1.218  | 0.150  | 1.373  | 0.128  | 1.510   | 0.113  | 5.791             | 9.00              | -64.01            | -6.93             |
| 11   | 0.750 | 0.220 | 0.705  | 0.120  | 0.710  | 0.107  | 0.740   | 0.100  | 1.523             | 6.38              | -45.15            | -14.24            |
| 12   | 1.062 | 0.290 | 1.217  | 0.260  | 1.373  | 0.257  | 1.397   | 0.270  | 4.891             | 8.89              | -39.53            | -6.98             |
| 13   | 1.230 | 0.260 | 1.721  | 0.250  | 1.979  | 0.249  | 2.310   | 0.241  | -3.467            | 2.43              | -39.53            | -6.98             |
| 14   | 0.600 | 0.270 | 0.530  | 0.220  | 0.440  | 0.190  | 0.310   | 0.170  | 5.643             | 9.25              | -28.28            | -16.70            |
| 15   | 0.912 | 0.312 | 0.960  | 0.232  | 1.008  | 0.210  | 1.058   | 0.192  | -1.204            | 4.42              | -26.73            | -6.00             |
| 16   | 0.861 | 0.600 | 0.686  | 0.510  | 0.510  | 0.419  | 0.286   | 0.296  | -2.326            | 2.28              | -13.18            | -8.75             |
| 17   | 0.700 | 0.280 | 0.570  | 0.130  | 0.460  | 0.070  | 0.350   | 0.010  | -0.769            | 5.89              | -13.08            | -7.86             |
| 18   | 0.792 | 0.383 | 0.733  | 0.188  | 0.690  | 0.100  | 0.600   | 0.000  | -1.204            | 4.42              | -13.08            | -7.86             |
| 19   | 0.830 | 0.364 | 0.784  | 0.136  | 0.744  | 0.027  | 0.719   | -0.085 | -2.905            | 1.93              | -13.08            | -7.86             |
| 20   | 0.665 | 0.275 | 0.641  | 0.151  | 0.615  | 0.095  | 0.565   | 0.045  | 1.521             | 6.59              | -22.46            | -6.36             |
| 21   | 0.742 | 0.299 | 0.672  | 0.145  | 0.643  | 0.057  | 0.678   | 0.022  | 1.879             | 7.17              | -14.16            | -6.01             |
| 22   | 0.650 | 0.232 | 0.590  | 0.112  | 0.567  | 0.042  | 0.545   | -0.005 | 1.879             | 7.17              | -15.97            | -6.38             |
| 23   | 0.773 | 0.343 | 0.725  | 0.163  | 0.690  | 0.080  | 0.688   | 0.010  | -2.483            | 1.12              | -22.46            | -6.36             |
| 24   | 0.830 | 0.185 | 0.890  | 0.045  | 0.945  | -0.005 | 1.005   | -0.035 | 1.362             | 7.31              | -39.53            | -6.98             |
| 25   | 0.750 | 0.308 | 0.646  | 0.107  | 0.614  | 0.032  | 0.652   | 0.012  | -1.204            | 4.42              | -12.25            | -6.46             |
| 26   | 0.820 | 0.125 | 0.830  | 0.021  | 0.835  | -0.040 | 0.880   | -0.085 | 1.645             | 7.08              | -64.01            | -6.93             |
| 27   | 0.730 | 0.310 | 0.660  | 0.115  | 0.635  | 0.040  | 0.725   | 0.005  | -3.095            | 5.07              | -22.46            | -6.36             |
| 28   | 0.794 | 0.334 | 0.750  | 0.140  | 0.782  | 0.080  | 0.780   | 0.040  | -3.095            | 5.07              | -14.16            | -6.01             |
| 29   | 0.800 | 0.343 | 0.737  | 0.136  | 0.743  | 0.043  | 0.763   | 0.003  | -3.095            | 5.07              | -12.02            | -4.99             |
| 30   | 1.852 | 0.187 | 1.579  | 0.020  | 1.367  | -0.023 | 1.100   | -0.034 | -3.095            | 5.07              | -15.97            | -6.38             |
| 31   | 0.675 | 0.270 | 0.620  | 0.115  | 0.655  | 0.070  | 0.645   | 0.015  | 1.362             | 7.31              | -22.46            | -6.36             |
| 32   | 0.836 | 0.134 | 0.820  | 0.024  | 0.816  | -0.030 | 0.850   | -0.070 | 1.362             | 7.31              | -64.01            | -6.93             |
| 33   | 0.794 | 0.165 | 0.817  | 0.045  | 0.862  | -0.005 | 0.932   | -0.035 | 1.645             | 7.08              | -39.53            | -6.98             |
| 34   | 0.910 | 0.216 | 0.996  | 0.116  | 1.056  | 0.056  | 1.120   | 0.024  | 1.362             | 7.31              | -26.73            | -6.00             |
| 35   | 0.940 | 0.234 | 1.010  | 0.124  | 1.090  | 0.066  | 1.160   | 0.016  | 1.362             | 7.31              | -22.91            | -5.50             |
| 36   | 0.819 | 0.420 | 0.689  | 0.221  | 0.560  | 0.130  | 0.411   | 0.041  | -0.769            | 5.89              | -12.59            | -8.18             |
| 37   | 0.665 | 0.162 | 0.610  | 0.043  | 0.612  | -0.006 | 0.591   | -0.050 | 1.362             | 7.31              | -32.66            | -11.98            |
| 38   | 0.757 | 0.304 | 0.734  | 0.141  | 0.731  | 0.051  | 0.824   | -0.001 | -2.483            | 1.12              | -12.77            | -4.66             |
| 39   | 0.730 | 0.270 | 0.660  | 0.066  | 0.666  | 0.030  | 0.676   | 0.014  | -4.350            | -0.75             | -26.73            | -6.00             |
| 40   | 0.804 | 0.337 | 0.745  | 0.134  | 0.730  | 0.047  | 0.725   | -0.032 | 0.970             | 4.98              | -22.46            | -6.36             |
| 41   | 0.730 | 0.265 | 0.695  | 0.130  | 0.650  | 0.075  | 0.635   | 0.025  | 1.645             | 7.08              | -15.97            | -6.38             |
| 42   | 0.860 | 0.310 | 0.791  | 0.014  | 0.744  | -0.114 | 0.740   | -0.210 | -4.044            | 0.05              | -16.45            | -5.41             |
| 43   | 0.795 | 0.342 | 0.770  | 0.170  | 0.765  | 0.075  | 0.740   | -0.008 | -1.204            | 4.42              | -12.02            | -4.99             |
| 44   | 0.686 | 0.210 | 0.684  | 0.107  | 0.660  | 0.065  | 0.696   | 0.037  | -0.716            | 4.20              | -15.89            | -13.76            |
| 45   | 0.810 | 0.355 | 0.703  | 0.120  | 0.657  | -0.005 | 0.613   | -0.085 | -3.002            | 4.29              | -22.46            | -6.36             |
| 46   | 0.714 | 0.210 | 0.638  | -0.042 | 0.604  | -0.124 | 0.578   | -0.204 | -4.370            | -0.01             | -11.60            | -5.23             |
| 47   | 0.743 | 0.283 | 0.681  | 0.091  | 0.614  | 0.003  | 0.768   | 0.000  | 1.052             | 4.29              | -17.46            | -10.76            |
| 48   | 0.780 | 0.294 | 0.747  | 0.070  | 0.727  | -0.020 | 0.706   | -0.114 | 1.168             | 5.52              | -12.40            | -4.33             |
| 49   | 0.790 | 0.334 | 0.720  | 0.166  | 0.720  | 0.108  | 0.682   | 0.018  | 1.168             | 5.52              | -22.46            | -6.36             |
| 50   | 0.803 | 0.361 | 0.759  | 0.134  | 0.755  | 0.041  | 0.755   | -0.035 | -1.244            | 3.24              | -22.46            | -6.36             |
| 51   | 0.807 | 0.319 | 0.737  | 0.062  | 0.784  | -0.018 | 0.826   | -0.080 | -1.244            | 3.24              | -13.39            | -5.21             |
| 52   | 0.707 | 0.280 | 0.645  | 0.125  | 0.638  | 0.047  | 0.632   | 0.033  | 0.388             | 5.10              | -15.97            | -6.38             |
| 53   | 0.695 | 0.285 | 0.628  | 0.120  | 0.615  | 0.095  | 0.710   | 0.078  | 1.166             | 4.38              | -11.67            | -4.79             |
| 54   | 0.730 | 0.270 | 0.660  | 0.066  | 0.666  | 0.030  | 0.676   | 0.014  | -0.502            | 4.35              | -15.97            | -6.38             |
| 55   | 0.845 | 0.325 | 1.414  | 0.304  | 1.395  | 0.180  | 1.340   | 0.035  | -4.168            | 0.12              | -12.09            | -3.97             |

**Table S3. Continue.**

| Salt | 0 GPa  |       | 20 GPa |        | 50 GPa |        | 100 GPa |        | Anion             |                   | Cation            |                   |
|------|--------|-------|--------|--------|--------|--------|---------|--------|-------------------|-------------------|-------------------|-------------------|
|      | M      | H     | M      | H      | M      | H      | M       | H      | $E_{\text{HOMO}}$ | $E_{\text{LUMO}}$ | $E_{\text{HOMO}}$ | $E_{\text{LUMO}}$ |
| 56   | 1.030  | 0.130 | 1.080  | 0.098  | 1.130  | 0.090  | 1.183   | 0.080  | -0.04             | 6.12              | -64.01            | -6.93             |
| 57   | 0.700  | 0.320 | 0.730  | 0.230  | 0.820  | 0.220  | 1.120   | 0.303  | -0.04             | 6.12              | -17.08            | -7.83             |
| 58   | 0.623  | 0.268 | 0.600  | 0.250  | 0.630  | 0.248  | 0.683   | 0.273  | -0.04             | 6.12              | -17.15            | -10.66            |
| 59   | 0.700  | 0.257 | 0.568  | 0.078  | 0.468  | -0.010 | 0.372   | -0.080 | -0.77             | 5.89              | -22.46            | -6.36             |
| 60   | 0.710  | 0.269 | 0.441  | -0.079 | 0.511  | -0.020 | 0.439   | -0.079 | -0.77             | 5.89              | -17.12            | -5.90             |
| 61   | 0.710  | 0.258 | 0.559  | 0.061  | 0.449  | -0.041 | 0.331   | -0.120 | -0.77             | 5.89              | -10.31            | -5.66             |
| 62   | 0.711  | 0.269 | 0.570  | 0.020  | 0.469  | -0.080 | 0.351   | -0.160 | -0.77             | 5.89              | -14.73            | -4.25             |
| 63   | 1.390  | 0.205 | 1.320  | 0.175  | 1.270  | 0.155  | 1.190   | 0.145  | 1.08              | 4.73              | -45.15            | -14.24            |
| 64   | -0.020 | 0.060 | -0.133 | 0.040  | -0.287 | 0.020  | -0.420  | 0.020  | 5.25              | 7.49              | -28.09            | -21.24            |
| 65   | 1.060  | 0.279 | 1.250  | 0.170  | 1.440  | 0.141  | 1.588   | 0.129  | -0.50             | 4.35              | -22.91            | -5.50             |

**Table S4. Decomposition equations applied for the calculations of the stored energy content ( $E_c$ ).**

| Salt | Decomposition equation                                                                                                                                                       |
|------|------------------------------------------------------------------------------------------------------------------------------------------------------------------------------|
| 1    | $2\text{NaCl} = \text{Na}_2 + \text{Cl}_2$                                                                                                                                   |
| 2    | $2\text{KBr} = \text{K}_2 + \text{Br}_2$                                                                                                                                     |
| 3    | $\text{BaTiO}_3 = \text{BaO} + \text{TiO}_2$                                                                                                                                 |
| 4    | $2\text{AlPO}_4 = \text{Al}_2\text{O}_3 + \text{P}_2\text{O}_5$                                                                                                              |
| 5    | $\text{CaCO}_3 = \text{CaO} + \text{CO}_2$                                                                                                                                   |
| 6    | $\text{Na}_3\text{AlF}_6 = 3\text{NaF} + \text{AlF}_3$                                                                                                                       |
| 7    | $\text{CaSO}_4 = \text{CaO} + \text{SO}_3$                                                                                                                                   |
| 8    | $\text{Na}_2\text{CO}_3 = \text{Na}_2\text{O} + \text{CO}_2$                                                                                                                 |
| 9    | $\text{Na}_2\text{C}_2\text{O}_4 = \text{Na}_2\text{O} + \text{CO}_2 + \text{CO}$                                                                                            |
| 10   | $\text{Li}_2\text{CO}_3 = \text{Li}_2\text{O} + \text{CO}_2$                                                                                                                 |
| 11   | $\text{C}_4\text{H}_2\text{O}_6\text{Ca} + 4\text{H}_2\text{O} = \text{CaO} + 4\text{CO} + 5\text{H}_2\text{O}$                                                              |
| 12   | $2\text{C}_6\text{H}_5\text{O}_7\text{Na}_3 = 3\text{Na}_2\text{O} + 5\text{H}_2\text{O} + 6\text{CO} + 6\text{C}$                                                           |
| 13   | $8\text{C}_5\text{H}_{11}\text{O}_8\text{SNa} + 8\text{H}_2\text{O} = 8\text{NaOH} \cdot \text{H}_2\text{O} + 40\text{H}_2\text{O} + 8\text{CO}_2 + 32\text{C} + \text{S}_8$ |
| 14   | $8\text{PbS} = 8\text{Pb} + \text{S}_8$                                                                                                                                      |
| 15   | $4\text{KNO}_3 = 2\text{N}_2 + 2\text{K}_2\text{O} + 5\text{O}_2$                                                                                                            |
| 16   | $16\text{C}_{13}\text{H}_{11}\text{N}_3\text{O}_5\text{S} = 24\text{N}_2 + 80\text{H}_2\text{O} + 8\text{H}_2\text{S} + \text{S}_8 + 208\text{C}$                            |
| 17   | $\text{C}_3\text{H}_7\text{ClN}_4\text{O}_6 + \text{H}_2\text{O} = 2\text{N}_2 + \text{HCl} + 4\text{H}_2\text{O} + 3\text{CO}$                                              |
| 18   | $2\text{C}_3\text{H}_7\text{N}_5\text{O}_9 = 5\text{N}_2 + 7\text{H}_2\text{O} + \text{CO} + 5\text{CO}_2$                                                                   |
| 19   | $4\text{C}_3\text{H}_7\text{N}_7\text{O}_{10} = 14\text{N}_2 + 14\text{H}_2\text{O} + 12\text{CO}_2 + \text{O}_2$                                                            |
| 20   | $\text{C}_2\text{H}_{14}\text{N}_{12}\text{O}_2 = \text{N}_2 + \text{CH}_4 + \text{H}_2 + \text{H}_2\text{O}$                                                                |
| 21   | $\text{C}_2\text{H}_{10}\text{N}_{12}\text{O} = 6\text{N}_2 + \text{H}_2\text{O} + 2\text{CH}_4$                                                                             |
| 22   | $2\text{C}_2\text{H}_8\text{N}_{10}\text{O}_3 = 10\text{N}_2 + 6\text{H}_2\text{O} + \text{CH}_4 + 3\text{C}$                                                                |
| 23   | $\text{C}_3\text{H}_6\text{N}_6\text{O}_5 = 3\text{N}_2 + 3\text{H}_2\text{O} + 2\text{CO} + \text{C}$                                                                       |
| 24   | $2\text{C}_2\text{H}_{10}\text{N}_8\text{O}_5\text{Na}_2 = 8\text{N}_2 + 4\text{NaOH} \cdot \text{H}_2\text{O} + 2\text{H}_2\text{O} + \text{CH}_4 + 3\text{C}$              |
| 25   | $\text{CH}_6\text{N}_6\text{O}_5 = 3\text{N}_2 + 3\text{H}_2\text{O} + \text{CO}_2$                                                                                          |
| 26   | $\text{C}_2\text{Li}_2\text{H}_8\text{N}_8\text{O}_6 = 4\text{N}_2 + 2\text{LiOH} \cdot \text{H}_2\text{O} + \text{CO} + \text{C} + \text{H}_2\text{O}$                      |
| 27   | $\text{H}_4\text{N}_6 = 2\text{H}_2 + 3\text{N}_2$                                                                                                                           |
| 28   | $2\text{H}_5\text{N}_7 = 5\text{H}_2 + 7\text{N}_2$                                                                                                                          |
| 29   | $2\text{C}_2\text{H}_6\text{N}_{10} = 3\text{CH}_4 + \text{C} + 10\text{N}_2$                                                                                                |
| 30   | $\text{H}_4\text{N}_6\text{O} + 2\text{H}_2\text{O} = 3\text{H}_2\text{O} + \text{H}_2 + 3\text{N}_2$                                                                        |
| 31   | $\text{C}_2\text{H}_8\text{N}_{10} = 2\text{CH}_4 + 5\text{N}_2$                                                                                                             |
| 32   | $2\text{C}_2\text{Li}_2\text{H}_8\text{N}_8\text{O}_4 = 4\text{H}_3\text{LiO}_2 + \text{CH}_4 + 3\text{C} + 8\text{N}_2$                                                     |
| 33   | $\text{C}_2\text{H}_8\text{N}_8\text{Na}_2\text{O}_6 = 2\text{H}_3\text{NaO}_2 + \text{H}_2\text{O} + 4\text{N}_2 + \text{CO} + \text{C}$                                    |
| 34   | $2\text{C}_2\text{H}_4\text{K}_2\text{N}_8\text{O}_2 = 4\text{KOH} + 8\text{N}_2 + \text{CH}_4 + 3\text{C}$                                                                  |
| 35   | $2\text{C}_2\text{H}_4\text{N}_8\text{O}_2\text{Rb}_2 = 4\text{RbOH} + 8\text{N}_2 + \text{CH}_4 + 3\text{C}$                                                                |
| 36   | $\text{C}_6\text{H}_5\text{ClN}_2 = \text{N}_2 + \text{HCl} + \text{CH}_4 + 5\text{C}$                                                                                       |
| 37   | $2\text{BaC}_2\text{H}_{10}\text{N}_8\text{O}_5 + 10\text{H}_2\text{O} = 2\text{BaO}_{10}\text{H}_{18} + 8\text{N}_2 + \text{CH}_4 + 3\text{C}$                              |
| 38   | $2\text{C}_4\text{H}_9\text{N}_9\text{O}_5 = 9\text{N}_2 + 9\text{H}_2\text{O} + \text{CO} + 7\text{C}$                                                                      |
| 39   | $\text{C}_6\text{H}_3\text{KN}_8\text{O}_9 = \text{KOH} + 4\text{N}_2 + \text{H}_2\text{O} + \text{CO}_2 + 5\text{CO}$                                                       |
| 40   | $\text{C}_2\text{H}_8\text{N}_6\text{O}_8 = 3\text{N}_2 + 4\text{H}_2\text{O} + 2\text{CO}_2$                                                                                |
| 41   | $\text{C}_2\text{H}_8\text{N}_{10}\text{O}_4 = 5\text{N}_2 + 4\text{H}_2\text{O} + 2\text{C}$                                                                                |
| 42   | $\text{C}_5\text{H}_8\text{N}_6\text{O}_6 = 3\text{N}_2 + 4\text{H}_2\text{O} + 2\text{CO} + 3\text{C}$                                                                      |

Table S4. Continue.

| Salt | Decomposition equation                              |
|------|-----------------------------------------------------|
| 43   | $C_2H_6N_6O_3 = 3N_2 + 3H_2O + 2C$                  |
| 44   | $C_2H_{14}N_{12}O_2 = 6N_2 + 2H_2O + 2CH_4 + H_2$   |
| 45   | $2ClH_4NO_4 = N_2 + 4H_2O + Cl_2 + O_2$             |
| 46   | $2C_9H_{10}N_{18}O_4 = 18N_2 + 8H_2O + CH_4 + 17C$  |
| 47   | $2C_5H_{11}N_{11}O_7 = 11N_2 + 11H_2O + 3CO + 7C$   |
| 48   | $2C_4H_{16}N_{16}O_5 = 16N_2 + 10H_2O + 3CH_4 + 5C$ |
| 49   | $C_2H_8N_8O_5 = 4N_2 + 4H_2O + CO + C$              |
| 50   | $C_6H_8N_{10}O_{11} = 5N_2 + 4H_2O + 5CO + CO_2$    |
| 51   | $C_8H_{12}N_{14}O_{11} = 7N_2 + 6H_2O + 5CO + 3C$   |
| 52   | $C_3H_8N_{10}O_5 = 5N_2 + 4H_2O + CO + 2C$          |
| 53   | $C_4H_8N_{16}O_2 = 8N_2 + 2H_2O + CH_4 + 3C$        |
| 54   | $C_2H_8N_{14}O_6 = 7N_2 + 4H_2O + 2CO$              |
| 55   | $2C_4H_9N_{11}O_6 = 11N_2 + 9H_2O + 3CO + 5C$       |
| 56   | $2LiN_3 = 2Li + 3N_2$                               |
| 57   | $2TlN_3 = 2Tl + 3N_2$                               |
| 58   | $2AgN_3 = 2Ag + 3N_2$                               |
| 59   | $2NH_4Cl = N_2 + 2HCl + 3H_2$                       |
| 60   | $2CH_6NCl = N_2 + 2HCl + 2CH_4 + H_2$               |
| 61   | $4C_5H_8N_3Cl = 6N_2 + 4HCl + 7CH_4 + 13C$          |
| 62   | $4C_4H_{14}OPCl = 4H_2O + 4HCl + 11CH_4 + 5C + 4P$  |
| 63   | $C_2H_6O_2Ca = CaO + H_2O + CH_4 + C$               |
| 64   | $4FeS_2 = 4Fe + S_8$                                |
| 65   | $C_2N_{12}O_4Rb_2 = 6N_2 + Rb_2O + CO_2 + CO$       |

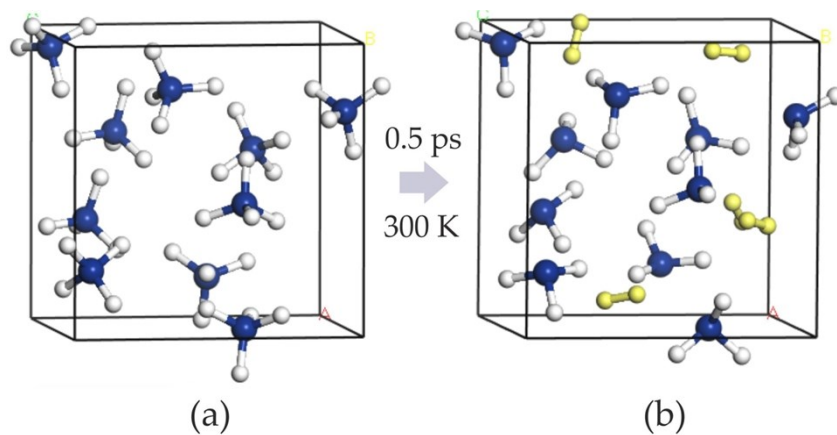

Fig. S3.  $NH_4\bullet$  radicals before (a) and after (b) MD simulation at ambient conditions.

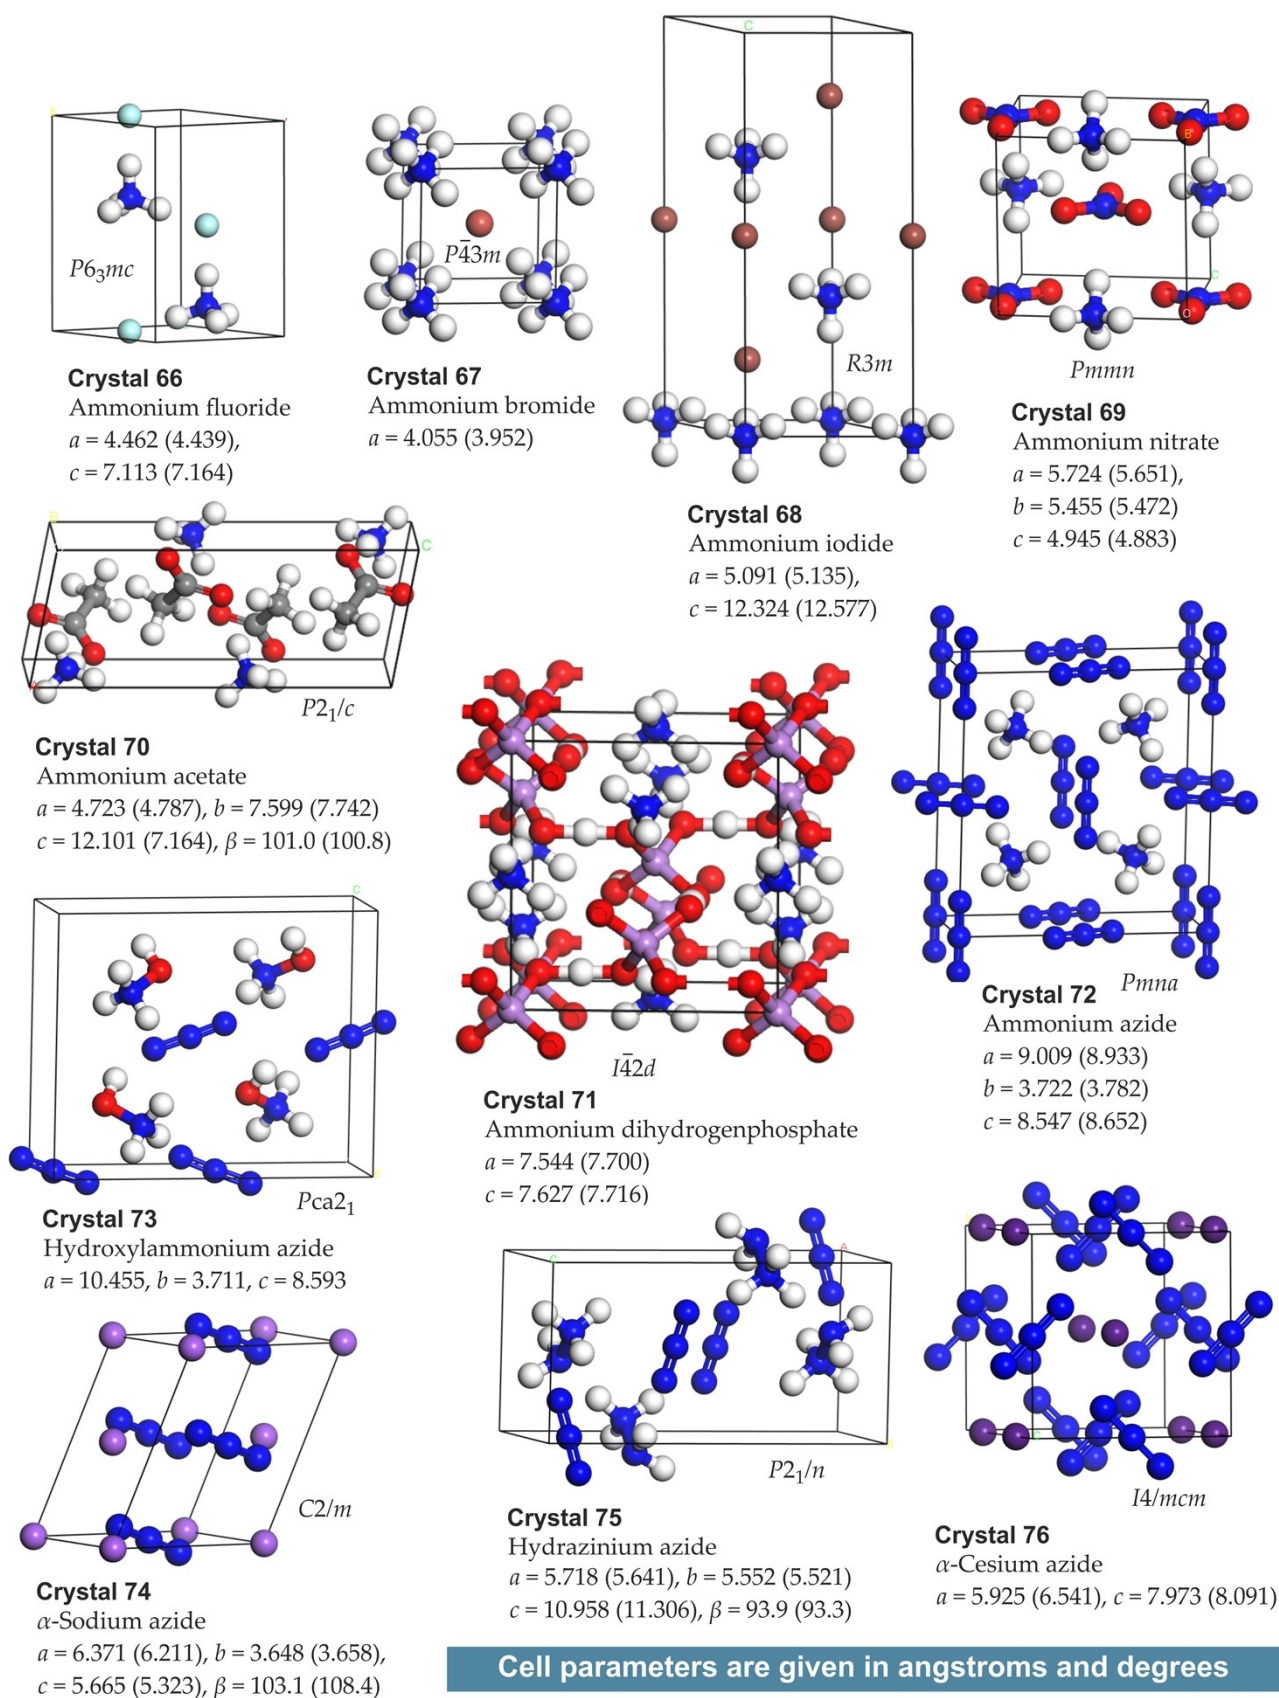

**Fig. S4.** Crystal structures along with the optimized and experimental (in parentheses) asymmetric cell parameters of salts 66-76.

**Table S5.** Hirshfeld charges ( $e^-$ ) of the cation in the  $\text{NH}_4\text{X}$  and  $\text{XN}_3$  series at various pressures along with conceptual DFT parameters (eV) of the corresponding radicals ( $\text{X}\cdot$ ) obtained in terms of the adiabatic approximation.

| Salt | X                        | 0 GPa | 20 GPa | 50 GPa | 100 GPa | $I$   | $A$   | $\eta$ | $\chi$ | $\omega$ |
|------|--------------------------|-------|--------|--------|---------|-------|-------|--------|--------|----------|
| 66   | F                        | 0.260 | 0.172  | 0.110  | 0.080   | 17.78 | 3.51  | 14.27  | 10.65  | 3.97     |
| 67   | Br                       | 0.248 | 0.070  | -0.033 | -0.112  | 11.96 | 3.58  | 8.38   | 7.77   | 3.60     |
| 68   | I                        | 0.278 | 0.047  | -0.057 | -0.142  | 12.14 | 3.25  | 8.89   | 7.70   | 3.33     |
| 69   | $\text{NO}_3$            | 0.370 | 0.176  | 0.070  | -0.006  | 13.75 | 4.03  | 9.72   | 8.89   | 4.07     |
| 70   | $\text{CH}_3\text{COO}$  | 0.306 | 0.220  | 0.174  | 0.116   | 11.41 | 3.15  | 8.26   | 7.28   | 3.21     |
| 71   | $\text{H}_2\text{PO}_4$  | 0.330 | 0.140  | 0.014  | -0.020  | 10.99 | 4.14  | 6.85   | 7.57   | 4.18     |
| 72   | $\text{NH}_4$            | 0.280 | 0.133  | 0.053  | -0.020  | 4.41  | -1.27 | 5.68   | 1.57   | 0.22     |
| 73   | $\text{NH}_3\text{OH}$   | 0.230 | 0.133  | 0.077  | 0.047   | 7.20  | -3.76 | 10.96  | 1.72   | 0.13     |
| 74   | Na                       | 0.268 | 0.223  | 0.220  | 0.233   | 5.42  | 0.60  | 4.82   | 3.01   | 0.94     |
| 75   | $\text{NH}_3\text{NH}_2$ | 0.310 | 0.173  | 0.090  | 0.047   | 7.20  | -3.76 | 10.96  | 1.72   | 0.13     |
| 76   | Cs                       | 0.300 | 0.280  | 0.280  | 0.290   | 4.01  | 0.49  | 3.53   | 2.25   | 0.72     |

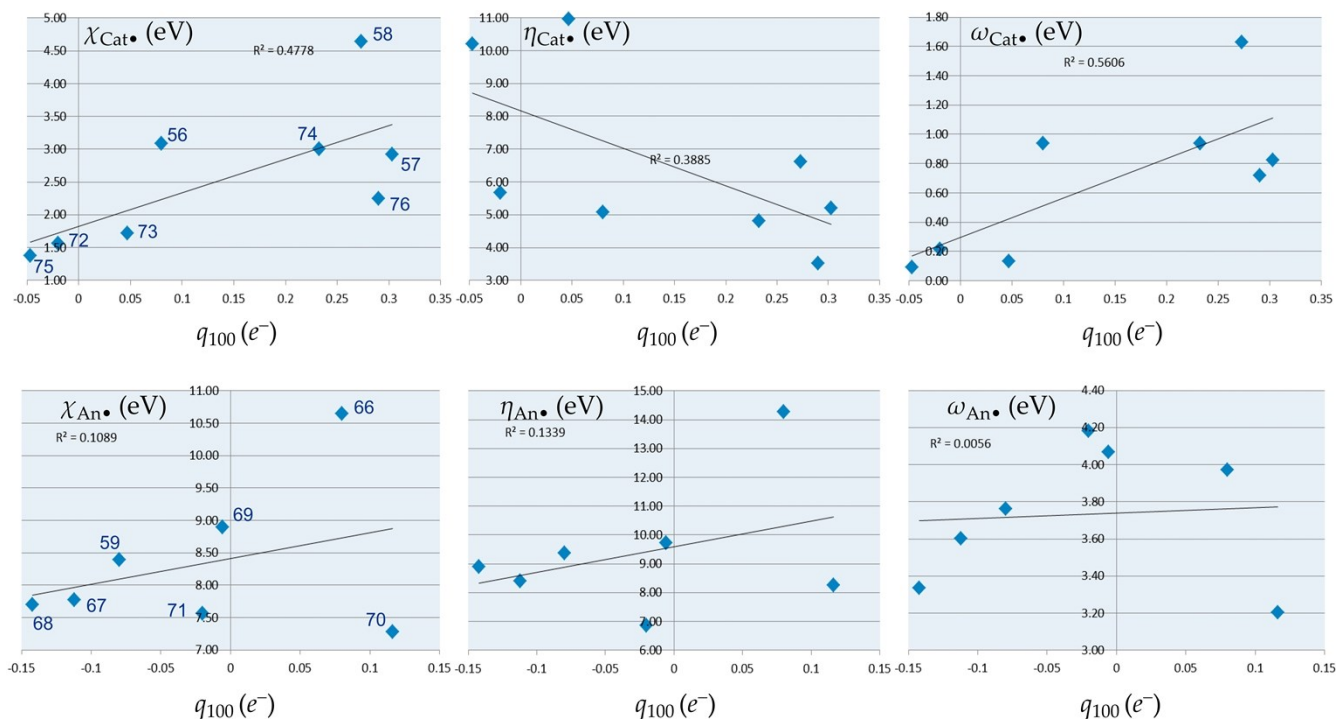

**Fig. S5.** Dependence of conceptual DFT parameters ( $\chi$ ,  $\eta$  and  $\omega$ ) on cationic charges at 100 GPa ( $q_{100}$ ) for the  $\text{NH}_4\text{X}$  and  $\text{XN}_3$  series salts.

**Table S6. The frontier molecular orbital energies and conceptual DFT parameters (in eV) obtained in terms of the vertical approximation.**

| Salt | $E_{\text{HOMO}}$ |        | $E_{\text{LUMO}}$ |        | $\eta$ |       | $\chi$ |       | $\omega$ |        |
|------|-------------------|--------|-------------------|--------|--------|-------|--------|-------|----------|--------|
|      | An•               | Cat•   | An•               | Cat•   | An•    | Cat•  | An•    | Cat•  | An•      | Cat•   |
| 1    | -9.30             | -3.51  | -6.85             | -1.77  | -2.44  | -1.74 | 8.08   | 2.64  | -13.34   | -2.01  |
| 2    | -8.89             | -2.90  | -6.42             | -1.60  | -2.47  | -1.30 | 7.66   | 2.25  | -11.88   | -1.95  |
| 3    | -1.96             | -8.28  | 0.04              | -6.90  | -2.00  | -1.38 | 0.96   | 7.59  | -0.23    | -20.88 |
| 4    | 3.65              | -25.37 | 5.78              | -22.19 | -2.13  | -3.19 | -4.71  | 23.78 | -5.22    | -88.76 |
| 5    | -2.28             | -9.87  | 1.11              | -8.07  | -3.39  | -1.80 | 0.58   | 8.97  | -0.05    | -22.41 |
| 6    | 0.76              | -3.51  | 3.61              | -1.77  | -2.85  | -1.74 | -2.19  | 2.64  | -0.84    | -2.01  |
| 7    | -2.83             | -9.87  | -0.37             | -8.07  | -2.45  | -1.80 | 1.60   | 8.97  | -0.52    | -22.41 |
| 8    | -2.28             | -3.51  | 1.11              | -1.77  | -3.39  | -1.74 | 0.58   | 2.64  | -0.05    | -2.01  |
| 9    | -2.46             | -3.51  | -0.37             | -1.77  | -2.09  | -1.74 | 1.42   | 2.64  | -0.48    | -2.01  |
| 10   | -2.28             | -3.65  | 1.11              | -1.51  | -3.39  | -2.14 | 0.58   | 2.58  | -0.05    | -1.55  |
| 11   | -1.58             | -9.87  | 0.96              | -8.07  | -2.55  | -1.80 | 0.31   | 8.97  | -0.02    | -22.41 |
| 12   | 0.46              | -3.51  | 1.38              | -1.77  | -0.92  | -1.74 | -0.92  | 2.64  | -0.46    | -2.01  |
| 13   | -7.57             | -3.51  | -6.77             | -1.77  | -0.80  | -1.74 | 7.17   | 2.64  | -32.20   | -2.01  |
| 14   | 0.33              | -10.97 | 2.26              | -9.54  | -1.93  | -1.43 | -1.29  | 10.25 | -0.43    | -36.82 |
| 15   | -10.50            | -2.90  | -6.97             | -1.60  | -3.53  | -1.30 | 8.74   | 2.25  | -10.80   | -1.95  |
| 16   | -7.67             | -5.28  | -6.26             | -3.40  | -1.41  | -1.88 | 6.96   | 4.34  | -17.15   | -5.02  |
| 17   | -9.30             | -6.72  | -6.85             | -3.52  | -2.44  | -3.20 | 8.08   | 5.12  | -13.34   | -4.09  |
| 18   | -10.50            | -6.72  | -6.97             | -3.52  | -3.53  | -3.20 | 8.74   | 5.12  | -10.80   | -4.09  |
| 19   | -9.71             | -6.72  | -6.04             | -3.52  | -3.67  | -3.20 | 7.87   | 5.12  | -8.45    | -4.09  |
| 20   | -3.03             | -6.35  | -0.93             | -1.11  | -2.10  | -5.24 | 1.98   | 3.73  | -0.93    | -1.33  |
| 21   | -3.49             | -7.39  | -1.37             | -2.64  | -2.12  | -4.75 | 2.43   | 5.01  | -1.39    | -2.65  |
| 22   | -3.49             | -7.78  | -1.37             | -4.03  | -2.12  | -3.75 | 2.43   | 5.90  | -1.39    | -4.64  |
| 23   | -7.57             | -6.35  | -5.35             | -1.11  | -2.22  | -5.24 | 6.46   | 3.73  | -9.38    | -1.33  |
| 24   | -3.21             | -3.51  | -1.44             | -1.77  | -1.77  | -1.74 | 2.33   | 2.64  | -1.53    | -2.01  |
| 25   | -10.50            | -7.40  | -6.97             | -4.11  | -3.53  | -3.28 | 8.74   | 5.76  | -10.80   | -5.04  |
| 26   | -2.81             | -3.65  | -1.31             | -1.51  | -1.50  | -2.14 | 2.06   | 2.58  | -1.41    | -1.55  |
| 27   | -7.99             | -6.35  | -5.43             | -1.11  | -2.56  | -5.24 | 6.71   | 3.73  | -8.80    | -1.33  |
| 28   | -7.99             | -7.39  | -5.43             | -2.64  | -2.56  | -4.75 | 6.71   | 5.01  | -8.80    | -2.65  |
| 29   | -7.99             | -3.99  | -5.43             | -1.38  | -2.56  | -2.62 | 6.71   | 2.68  | -8.80    | -1.38  |
| 30   | -7.99             | -7.78  | -5.43             | -4.03  | -2.56  | -3.75 | 6.71   | 5.90  | -8.80    | -4.64  |
| 31   | -3.21             | -6.35  | -1.44             | -1.11  | -1.77  | -5.24 | 2.33   | 3.73  | -1.53    | -1.33  |
| 32   | -3.21             | -3.65  | -1.44             | -1.51  | -1.77  | -2.14 | 2.33   | 2.58  | -1.53    | -1.55  |
| 33   | -2.81             | -3.51  | -1.31             | -1.77  | -1.50  | -1.74 | 2.06   | 2.64  | -1.41    | -2.01  |
| 34   | -3.21             | -2.90  | -1.44             | -1.60  | -1.77  | -1.30 | 2.33   | 2.25  | -1.53    | -1.95  |
| 35   | -3.21             | -2.80  | -1.44             | -1.60  | -1.77  | -1.20 | 2.33   | 2.20  | -1.53    | -2.01  |
| 36   | -9.30             | -5.66  | -6.85             | -2.18  | -2.44  | -3.48 | 8.08   | 3.92  | -13.34   | -2.21  |
| 37   | -3.21             | -8.28  | -1.44             | -6.90  | -1.77  | -1.38 | 2.33   | 7.59  | -1.53    | -20.88 |
| 38   | -7.57             | -3.96  | -5.35             | -0.91  | -2.22  | -3.05 | 6.46   | 2.44  | -9.38    | -0.97  |
| 39   | -8.68             | -2.90  | -6.89             | -1.60  | -1.79  | -1.30 | 7.78   | 2.25  | -16.97   | -1.95  |
| 40   | -3.00             | -6.35  | -1.21             | -1.11  | -1.79  | -5.24 | 2.11   | 3.73  | -1.24    | -1.33  |
| 41   | -2.81             | -7.78  | -1.31             | -4.03  | -1.50  | -3.75 | 2.06   | 5.90  | -1.41    | -4.64  |
| 42   | -9.23             | -2.07  | -7.07             | -0.69  | -2.15  | -1.38 | 8.15   | 1.38  | -15.43   | -0.69  |
| 43   | -10.50            | -3.99  | -6.97             | -1.38  | -3.53  | -2.62 | 8.74   | 2.68  | -10.80   | -1.38  |
| 44   | -3.16             | -9.87  | -2.50             | -7.20  | -0.66  | -2.67 | 2.83   | 8.54  | -6.08    | -13.65 |
| 45   | -10.18            | -6.35  | -7.25             | -1.11  | -2.93  | -5.24 | 8.71   | 3.73  | -12.95   | -1.33  |
| 46   | -7.21             | -2.81  | -4.24             | -0.56  | -2.97  | -2.25 | 5.73   | 1.68  | -5.52    | -0.63  |
| 47   | -3.40             | -8.37  | -1.37             | -5.37  | -2.03  | -2.99 | 2.39   | 6.87  | -1.40    | -7.89  |
| 48   | -3.06             | -3.20  | -0.89             | -0.70  | -2.17  | -2.50 | 1.97   | 1.95  | -0.90    | -0.76  |
| 49   | -3.06             | -6.35  | -0.89             | -1.11  | -2.17  | -5.24 | 1.97   | 3.73  | -0.90    | -1.33  |
| 50   | -3.87             | -6.35  | -3.34             | -1.11  | -0.52  | -5.24 | 3.61   | 3.73  | -12.40   | -1.33  |
| 51   | -3.87             | -3.59  | -3.34             | -0.64  | -0.52  | -2.95 | 3.61   | 2.12  | -12.40   | -0.76  |
| 52   | -3.64             | -7.78  | -1.84             | -4.03  | -1.81  | -3.75 | 2.74   | 5.90  | -2.08    | -4.64  |
| 53   | -3.53             | -4.25  | -1.59             | -1.60  | -1.94  | -2.65 | 2.56   | 2.92  | -1.69    | -1.62  |
| 54   | -3.96             | -7.78  | -3.00             | -4.03  | -0.96  | -3.75 | 3.48   | 5.90  | -6.34    | -4.64  |
| 55   | -9.88             | -3.43  | -7.45             | -0.87  | -2.42  | -2.55 | 8.66   | 2.15  | -15.48   | -0.90  |
| 56   | -8.49             | -3.65  | -5.50             | -1.51  | -2.99  | -2.14 | 6.99   | 2.58  | -8.17    | -1.55  |
| 57   | -8.49             | -3.25  | -5.50             | -2.03  | -2.99  | -1.22 | 6.99   | 2.64  | -8.17    | -2.86  |

Table S6. Continue.

| Salt | $E_{\text{HOMO}}$ |        | $E_{\text{LUMO}}$ |        | $\eta$ |       | $\chi$ |       | $\omega$ |        |
|------|-------------------|--------|-------------------|--------|--------|-------|--------|-------|----------|--------|
|      | An•               | Cat•   | An•               | Cat•   | An•    | Cat•  | An•    | Cat•  | An•      | Cat•   |
| 58   | -8.49             | -5.33  | -5.50             | -3.46  | -2.99  | -1.87 | 6.99   | 4.39  | -8.17    | -5.16  |
| 59   | -9.30             | -6.35  | -6.85             | -1.11  | -2.44  | -5.24 | 8.08   | 3.73  | -13.34   | -1.33  |
| 60   | -9.30             | -2.37  | -6.85             | -0.98  | -2.44  | -1.39 | 8.08   | 1.68  | -13.34   | -1.01  |
| 61   | -9.30             | -2.97  | -6.85             | -0.73  | -2.44  | -2.24 | 8.08   | 1.85  | -13.34   | -0.77  |
| 62   | -9.30             | -1.85  | -6.85             | -1.02  | -2.44  | -0.83 | 8.08   | 1.44  | -13.34   | -1.24  |
| 63   | -7.52             | -9.87  | -4.10             | -8.07  | -3.42  | -1.80 | 5.81   | 8.97  | -4.93    | -22.41 |
| 64   | 0.40              | -13.48 | 1.95              | -11.64 | -1.55  | -1.83 | -1.17  | 12.56 | -0.44    | -43.03 |
| 65   | -3.96             | -2.80  | -3.00             | -1.60  | -0.96  | -1.20 | 3.48   | 2.20  | -6.34    | -2.01  |

Table S7. The frontier molecular orbital energies and conceptual DFT parameters (in eV) obtained in terms of the adiabatic approximation.

| Salt | $E_{\text{HOMO}}$ |       | $E_{\text{LUMO}}$ |       | $\eta$ |        | $\chi$ |       | $\omega$ |       |
|------|-------------------|-------|-------------------|-------|--------|--------|--------|-------|----------|-------|
|      | An•               | Cat•  | An•               | Cat•  | An•    | Cat•   | An•    | Cat•  | An•      | Cat•  |
| 1    | 13.07             | 5.41  | 3.71              | 0.60  | 9.36   | 4.81   | 8.39   | 3.00  | 3.76     | 0.94  |
| 2    | 11.96             | 4.50  | 3.58              | 0.52  | 8.38   | 3.98   | 7.77   | 2.51  | 3.60     | 0.79  |
| 3    | 3.58              | 10.14 | -1.91             | 5.22  | 5.49   | 4.91   | 0.84   | 7.68  | 0.06     | 6.00  |
| 4    | -1.39             | 28.96 | -7.37             | 18.93 | 5.99   | 10.03  | -4.38  | 23.95 | 1.60     | 28.59 |
| 5    | 5.12              | 12.09 | -3.54             | 6.15  | 8.65   | 5.94   | 0.79   | 9.12  | 0.04     | 7.00  |
| 6    | 0.57              | 5.41  | -4.64             | 0.60  | 5.21   | 4.81   | -2.04  | 3.00  | 0.40     | 0.94  |
| 7    | 5.27              | 12.09 | -1.52             | 6.15  | 6.80   | 5.94   | 1.88   | 9.12  | 0.26     | 7.00  |
| 8    | 5.12              | 5.41  | -3.54             | 0.60  | 8.65   | 4.81   | 0.79   | 3.00  | 0.04     | 0.94  |
| 9    | 0.32              | 5.41  | -2.41             | 0.60  | 2.73   | 4.81   | -1.05  | 3.00  | 0.20     | 0.94  |
| 10   | 5.12              | 5.62  | -3.54             | 0.55  | 8.65   | 5.07   | 0.79   | 3.08  | 0.04     | 0.94  |
| 11   | 1.25              | 12.09 | -0.57             | 6.15  | 1.82   | 5.94   | 0.34   | 9.12  | 0.03     | 7.00  |
| 12   | -2.12             | 5.41  | -4.06             | 0.60  | 1.94   | 4.81   | -3.09  | 3.00  | 2.46     | 0.94  |
| 13   | 6.93              | 5.41  | 5.28              | 0.60  | 1.66   | 4.81   | 6.11   | 3.00  | 11.26    | 0.94  |
| 14   | 2.20              | 13.83 | -4.04             | 7.01  | 6.23   | 6.82   | -0.92  | 10.42 | 0.07     | 7.96  |
| 15   | 13.75             | 4.50  | 4.03              | 0.52  | 9.72   | 3.98   | 8.89   | 2.51  | 4.07     | 0.79  |
| 16   | 8.31              | 7.01  | 4.33              | 1.79  | 3.98   | 5.22   | 6.32   | 4.40  | 5.02     | 1.86  |
| 17   | 13.07             | 7.05  | 3.71              | 4.26  | 9.36   | 2.80   | 8.39   | 5.66  | 3.76     | 5.72  |
| 18   | 13.75             | 7.05  | 4.03              | 4.26  | 9.72   | 2.80   | 8.89   | 5.66  | 4.07     | 5.72  |
| 19   | 11.68             | 7.05  | 4.66              | 4.26  | 7.03   | 2.80   | 8.17   | 5.66  | 4.75     | 5.72  |
| 20   | 4.58              | 4.40  | -0.33             | -1.27 | 4.91   | 5.68   | 2.12   | 1.57  | 0.46     | 0.22  |
| 21   | 5.09              | 6.45  | -0.25             | -3.71 | 5.34   | 10.16  | 2.42   | 1.37  | 0.55     | 0.09  |
| 22   | 5.09              | 7.20  | -0.25             | -3.76 | 5.34   | 10.96  | 2.42   | 1.72  | 0.55     | 0.13  |
| 23   | 9.22              | 4.40  | 3.89              | -1.27 | 5.33   | 5.68   | 6.55   | 1.57  | 4.03     | 0.22  |
| 24   | 4.62              | 5.41  | -0.08             | 0.60  | 4.70   | 4.81   | 2.27   | 3.00  | 0.55     | 0.94  |
| 25   | 13.75             | 6.54  | 4.03              | 3.75  | 9.72   | 2.79   | 8.89   | 5.14  | 4.07     | 4.74  |
| 26   | 5.25              | 5.62  | -0.15             | 0.55  | 5.40   | 5.07   | 2.55   | 3.08  | 0.60     | 0.94  |
| 27   | 10.55             | 4.40  | 2.39              | -1.27 | 8.16   | 5.68   | 6.47   | 1.57  | 2.56     | 0.22  |
| 28   | 10.55             | 6.45  | 2.39              | -3.71 | 8.16   | 10.16  | 6.47   | 1.37  | 2.56     | 0.09  |
| 29   | 10.55             | 4.41  | 2.39              | 0.28  | 8.16   | 4.14   | 6.47   | 2.35  | 2.56     | 0.67  |
| 30   | 10.55             | 7.20  | 2.39              | -3.76 | 8.16   | 10.96  | 6.47   | 1.72  | 2.56     | 0.13  |
| 31   | 4.62              | 4.40  | -0.08             | -1.27 | 4.70   | 5.68   | 2.27   | 1.57  | 0.55     | 0.22  |
| 32   | 4.62              | 5.62  | -0.08             | 0.55  | 4.70   | 5.07   | 2.27   | 3.08  | 0.55     | 0.94  |
| 33   | 5.25              | 5.41  | -0.15             | 0.60  | 5.40   | 4.81   | 2.55   | 3.00  | 0.60     | 0.94  |
| 34   | 4.62              | 4.50  | -0.08             | 0.52  | 4.70   | 3.98   | 2.27   | 2.51  | 0.55     | 0.79  |
| 35   | 4.62              | 4.34  | -0.08             | 0.49  | 4.70   | 3.85   | 2.27   | 2.41  | 0.55     | 0.76  |
| 36   | 13.07             | 6.78  | 3.71              | 1.10  | 9.36   | 5.68   | 8.39   | 3.94  | 3.76     | 1.37  |
| 37   | 4.62              | 10.14 | -0.08             | 5.22  | 4.70   | 4.91   | 2.27   | 7.68  | 0.55     | 6.00  |
| 38   | 9.22              | 3.94  | 3.89              | 0.17  | 5.33   | 3.77   | 6.55   | 2.06  | 4.03     | 0.56  |
| 39   | 10.04             | 4.50  | 5.60              | 0.52  | 4.45   | 3.98   | 7.82   | 2.51  | 6.88     | 0.79  |
| 40   | 4.20              | 4.40  | 0.09              | -1.27 | 4.11   | 5.68   | 2.14   | 1.57  | 0.56     | 0.22  |
| 41   | 5.25              | 7.20  | -0.15             | -3.76 | 5.40   | 10.96  | 2.55   | 1.72  | 0.60     | 0.13  |
| 42   | 10.80             | 3.75  | 5.59              | -0.75 | 5.20   | 4.51   | 8.20   | 1.50  | 6.46     | 0.25  |
| 43   | 13.75             | 4.41  | 4.03              | 0.28  | 9.72   | 4.14   | 8.89   | 2.35  | 4.07     | 0.67  |
| 44   | 5.50              | -2.24 | 1.84              | 7.80  | 3.66   | -10.03 | 3.67   | 2.78  | 1.84     | -0.38 |



Table S7. Continue.

| Salt | $E_{\text{HOMO}}$ |       | $E_{\text{LUMO}}$ |       | $\eta$ |       | $\chi$ |       | $\omega$ |      |
|------|-------------------|-------|-------------------|-------|--------|-------|--------|-------|----------|------|
|      | An•               | Cat•  | An•               | Cat•  | An•    | Cat•  | An•    | Cat•  | An•      | Cat• |
| 45   | 12.34             | 4.40  | 5.29              | -1.27 | 7.05   | 5.68  | 8.82   | 1.57  | 5.52     | 0.22 |
| 46   | 8.18              | 4.00  | 5.54              | 0.31  | 2.64   | 3.69  | 6.86   | 2.16  | 8.92     | 0.63 |
| 47   | 4.70              | 9.22  | 0.17              | 4.54  | 4.53   | 4.68  | 2.44   | 6.88  | 0.66     | 5.06 |
| 48   | 4.76              | 3.72  | 0.26              | -0.41 | 4.50   | 4.12  | 2.51   | 1.65  | 0.70     | 0.33 |
| 49   | 4.76              | 4.40  | 0.26              | -1.27 | 4.50   | 5.68  | 2.51   | 1.57  | 0.70     | 0.22 |
| 50   | 5.92              | 4.40  | 2.31              | -1.27 | 3.61   | 5.68  | 4.12   | 1.57  | 2.35     | 0.22 |
| 51   | 5.92              | 4.25  | 2.31              | -0.44 | 3.61   | 4.70  | 4.12   | 1.90  | 2.35     | 0.39 |
| 52   | 5.38              | 7.20  | 0.71              | -3.76 | 4.66   | 10.96 | 3.04   | 1.72  | 0.99     | 0.13 |
| 53   | 4.81              | 4.25  | 0.21              | 0.54  | 4.60   | 3.71  | 2.51   | 2.40  | 0.69     | 0.77 |
| 54   | 6.10              | 7.20  | 1.80              | -3.76 | 4.30   | 10.96 | 3.95   | 1.72  | 1.81     | 0.13 |
| 55   | 11.55             | 3.71  | 5.89              | -0.10 | 5.65   | 3.81  | 8.72   | 1.80  | 6.72     | 0.43 |
| 56   | 12.78             | 5.62  | 2.71              | 0.55  | 10.06  | 5.07  | 7.75   | 3.08  | 2.98     | 0.94 |
| 57   | 12.78             | 5.51  | 2.71              | 0.35  | 10.06  | 5.16  | 7.75   | 2.93  | 2.98     | 0.83 |
| 58   | 12.78             | 7.95  | 2.71              | 1.32  | 10.06  | 6.63  | 7.75   | 4.64  | 2.98     | 1.62 |
| 59   | 13.07             | 4.40  | 3.71              | -1.27 | 9.36   | 5.68  | 8.39   | 1.57  | 3.76     | 0.22 |
| 60   | 13.07             | 4.14  | 3.71              | -0.55 | 9.36   | 4.69  | 8.39   | 1.79  | 3.76     | 0.34 |
| 61   | 13.07             | 4.37  | 3.71              | -0.67 | 9.36   | 5.04  | 8.39   | 1.85  | 3.76     | 0.34 |
| 62   | 13.07             | 3.05  | 3.71              | -0.10 | 9.36   | 3.16  | 8.39   | 1.47  | 3.76     | 0.34 |
| 63   | 7.36              | 12.09 | 1.42              | 6.15  | 5.94   | 5.94  | 4.39   | 9.12  | 1.62     | 7.00 |
| 64   | 1.78              | 16.49 | -3.67             | 7.44  | 5.45   | 9.05  | -0.95  | 11.96 | 0.08     | 7.91 |
| 65   | 6.10              | 4.34  | 1.80              | 0.49  | 4.30   | 3.85  | 3.95   | 2.41  | 1.81     | 0.76 |

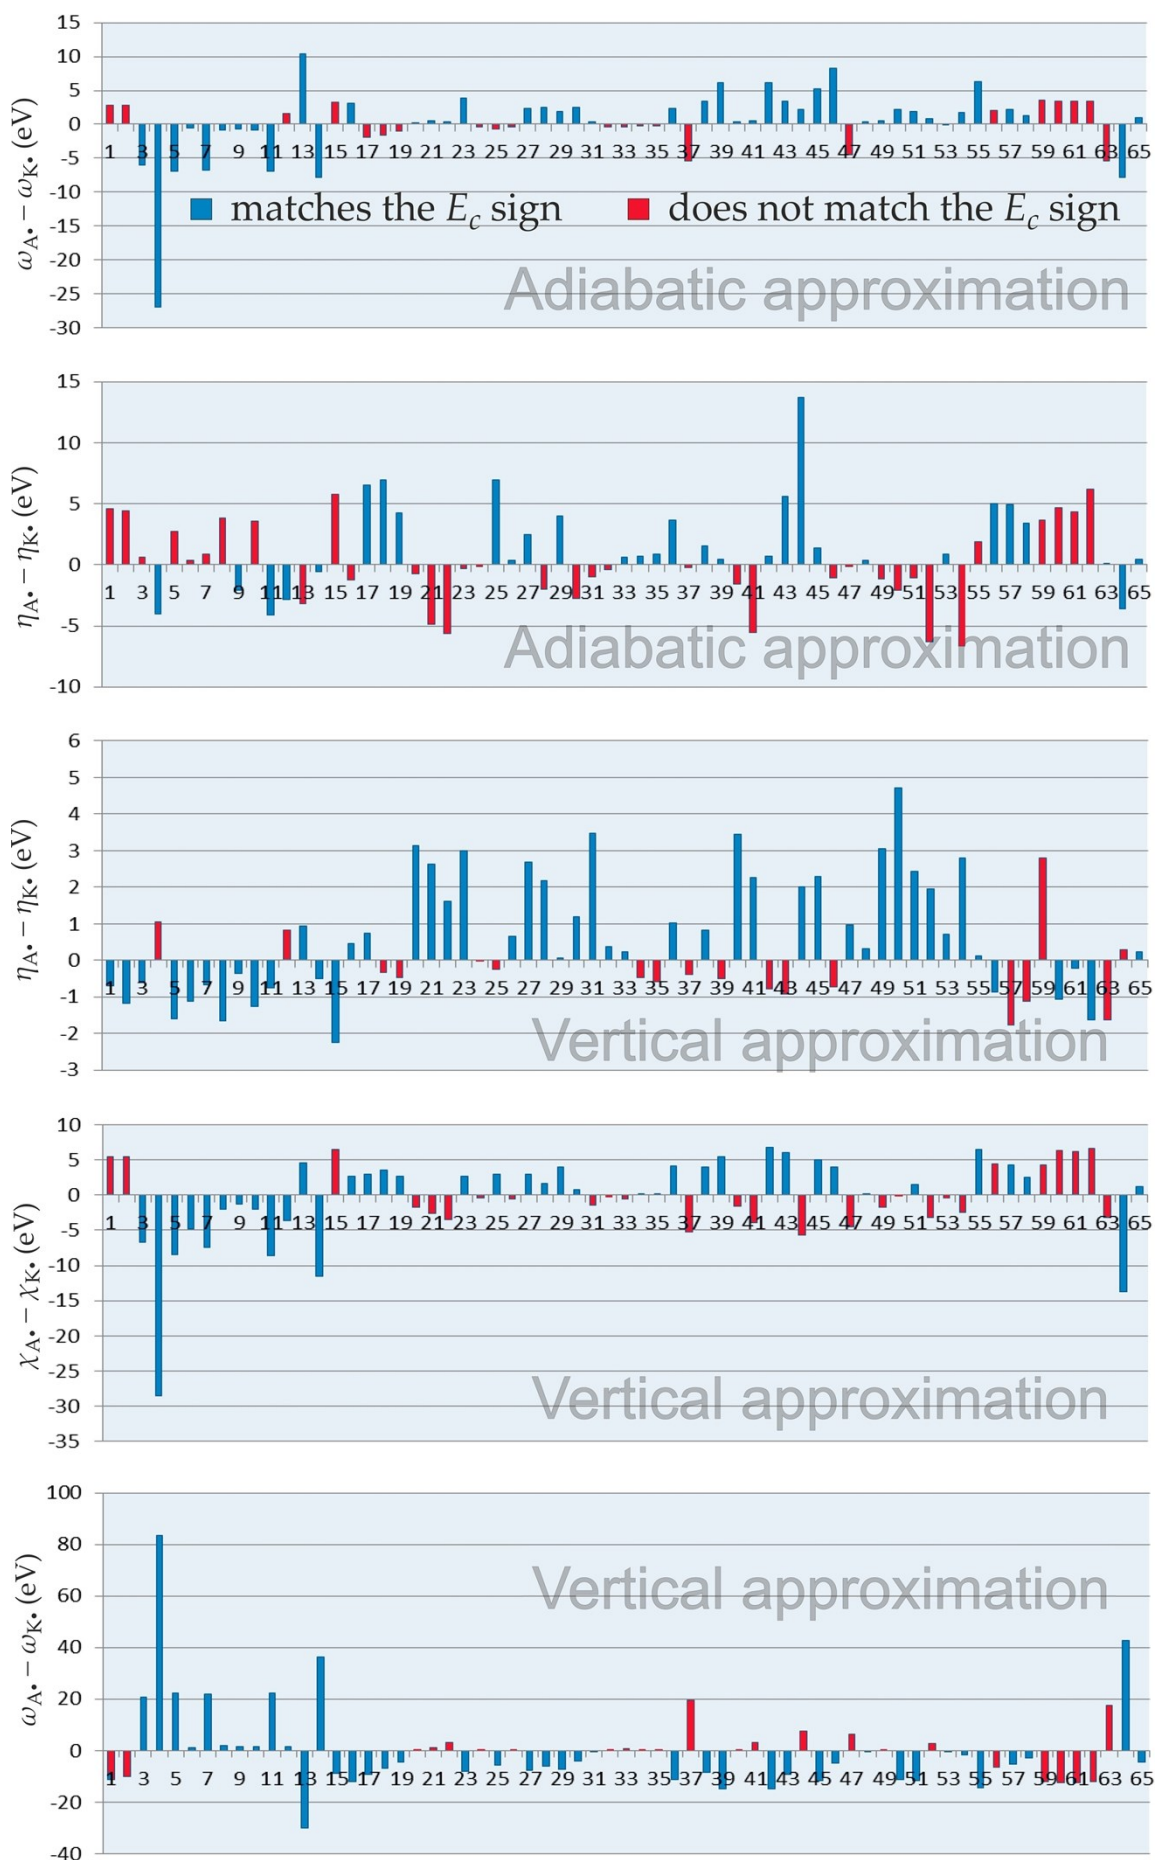

**Fig. S6.** Efficiency of various conceptual DFT parameters in distinguishing of compounds with the positive and negative energy content.
